# Supplementary material for: Measurement of greenhouse gas fluxes in agricultural soils with a flexible, open-design automated system
Source: Copernicus journal article supplement (doi:10.5194/egusphere-2024-804), 2024-04-11
Supplement: Supplementary file [file egusphere-2024-804-AC2-supplement.pdf]

*Here the authors have compared measurements of soil gas fluxes using chambers and an automated chamber design based on the 'Queensland design'. Please see the uploaded pdf for grammatical/text suggestions. The manuscript is reasonably clear to read but would benefit from editing. The abstract contains repetition of ideas. As I began to read the manuscript I wondered what the new knowledge to be delivered to the reader would be. I'm not sure after finishing the text I have learnt anything new. Please emphasise what is novel with the study. Others have compared automated and manual chamber methods as noted in the text. Others have used automated results to help decide when to take manual chamber samples to reduce diel variation/bias in manual sampling (e.g. van der Weerden et al. 2013) - such an approach could be used here too. As a reader I want to know what method was more accurate. Obviously we know automated methods provide greater frequency. How significant was the diel variation? What error might be incurred by taking manual samples at any given time? What were the respective detection limits for the two methods? What other biases/benefits did the methods give? - e.g. automated chambers have clear walls allowing photosynthesis and plant function but chambers were opaque shutting down photosynthesis so implications for the CO<sub>2</sub> flux and actually what the flux represents. Overall I think some more detail around the methodologies is clearly needed and the discussion should be better developed to clearly state what is novel about the manuscript.*

*Grace et al. 2020 Global Research Alliance N<sub>2</sub>O chamber methodology guidelines: Considerations for automated flux measurement. J Environmental Quality*

*van der Weerden, T. J., Clough, T. J., & Styles, T. M. (2013). Using near continuous measurements of N<sub>2</sub>O emission from urine-affected soil to guide manual gas sampling regimes. New Zealand Journal of Agricultural 1140*

We thank the Reviewer for his comments and suggestions. Changes in the text are highlighted in yellow

The abstract was rewritten to avoid repetition of ideas.

We agree with the Reviewer that automated chamber systems have been in use for more than two decades. However, still to date, the implementation of this system is scary due to different reasons as we explain in the introduction (L86-91).

One important aspect of this automated chamber system is that the multiplexer, which is controlled by a relay board based on Arduino are easily controlled by an R script. In that way, the system became an open-source system by replacing the relay board depending on the desired number of cameras allowed to operate with a different number of chambers. Since this novelty of the system was not clear in the previous version, we have modified the text to clarify it (L92-98; L170-179).

The objective of this study is to develop and test an automated chamber system. For that objective, we used as a “reference” method the manual chamber system due to our expertise working with it which resulted in several publications (L186-187). However, despite the objective of this work is not to give recommendations about sampling time or which system must be used, we highlighted that for our conditions, 06:00 GMT is an appropriate hour to carry out gas sampling with a manual chamber system to have a representative daily emission of N<sub>2</sub>O, the main greenhouse gas from agricultural soil. (L395-399).

We agree with the Reviewer that there is a lack of information about the accuracy and detection limits of both methods. In the new version of the manuscript, we calculated the Minimum Detectable Flux (MDF) for both systems based on Nickersen (2016). (L299-309)

*“In line with the previous explanation, the Minimum Detectable Flux (MDF) following the equation presented by Nickerson (2016) was calculated for methodologies. The MDF method not only considered the accuracy of the analyser but also considered the area and volume of the chamber and the enclosure time, factors that are different between both methodologies compared in this work. The MDFs for the automated chamber system were 1.209 mg CO<sub>2</sub>-C m<sup>-2</sup> day<sup>-1</sup>, 0.012 mg CH<sub>4</sub>-C m<sup>-2</sup> day<sup>-1</sup> and 0.059 mg N<sub>2</sub>O-N m<sup>-2</sup> day<sup>-1</sup>, while for the manual chamber system, MDFs values were 14.050 mg CO<sub>2</sub>-C m<sup>-2</sup> day<sup>-1</sup>, 0.143 mg CH<sub>4</sub>-C m<sup>-2</sup> day<sup>-1</sup> and 0.071 mg N<sub>2</sub>O-N m<sup>-2</sup> day<sup>-1</sup>. MDF was greater for the automated chamber system for the three gases, considering a similar enclosure time of 20 minutes and an average air temperature during the experiment of 20° C. The differences in MDF found between both methodologies was another factor that explained the greatest fluxes values observed under the automated chamber system. ”*

- Nickerson, N. (2016). Evaluating gas emission measurements using Minimum Detectable Flux (MDF). Eosense Inc., Dartmouth, Nova Scotia, Canada.

We also agree with the Reviewer that the explanation about the sampling time effect was too vague. In this new version of the manuscript, we added more information about the effect of sampling hour on the estimation of soil gas fluxes (L353-368).

*“Based on the daily emissions pattern observed, right panels of Figure 5, the time of sampling can have a very high impact on the gases flux estimation for manual chambers systems, especially when only one sampling is done per day. For CO<sub>2</sub> emissions, carried out the manual sampling at 06:00 GMT suppose and underestimation of 43% respect to the mean daily flux estimated over 24 hours with automated chamber system. Average soil CO<sub>2</sub> fluxes determined with the manual chamber system over the nine dates was 836 mg CO<sub>2</sub>-C m<sup>-2</sup> day<sup>-1</sup>, while the 24 hours CO<sub>2</sub> flux for the same nine date measuring with the automated chambers system was 1469 mg CO<sub>2</sub>-C m<sup>-2</sup> day<sup>-1</sup>. In contrast, sampling hour had a minimum impact on soil CH<sub>4</sub> fluxes, obtaining the similar average flux in both systems, 0.066 and 0.068 836 mg CH<sub>4</sub>-C m<sup>-2</sup> day<sup>-1</sup> for the manual and the automated chamber system, respectively.*

*Regarding N<sub>2</sub>O emissions, 06:00 GMT resulted in an adequate sampling hour to obtain a representative daily emission. Average soil N<sub>2</sub>O flux of the nine manual sampling was 0.38 mg N<sub>2</sub>O-N m<sup>-2</sup> day<sup>-1</sup>, while the daily average for the same nine dates estimated with the automated chamber system was 0.41 mg N<sub>2</sub>O-N m<sup>-2</sup> day<sup>-1</sup>, resulting the fluxes determined with the manual chambers in an underestimation of 7% compared to the N<sub>2</sub>O fluxes determined with the automated chambers.”*

From our point of view, the main benefit of the automated chamber system is the greatest measurement frequency that provide, resulting in better estimation of the cumulative emissions and allowing to capture with higher precision important events for soil gas emissions such as fertilization o rewetting events.

Other aspects like having clear walls, from our perspective, are aspects that are not linked to the operation of the chambers, i.e., whether sampling is manual or by an autonomous system. Having translucent wall to allow photosynthesis it is also possible with manual chamber and the election of the kind of wall will depend on the objective of work.

Finally, as the reviewer suggested, we will carefully review your comments in the text and improve the content of the document itself.

1 Measurement of greenhouse gas fluxes in agricultural soils with a flexible, open-design  
2 automated system

3 Samuel Franco-Luesma <sup>1\*</sup>, María Alonso-Ayuso <sup>1,2</sup>, Benjamin Wolf <sup>3</sup>, Borja Latorre <sup>1</sup>,  
4 Jorge Álvaro-Fuentes <sup>1</sup>

5 <sup>1</sup> Soil and Water Department, Experimental Station of Aula Dei, Spanish National Research Council  
6 (CSIC), Zaragoza, Spain

7 <sup>2</sup> Agricultural Technological Institute of Castilla y León, Valladolid, Spain.

8 <sup>3</sup> Institute of Meteorology and Climate Research, Atmos. Environ.al Research (IMK-IFU), Karlsruhe  
9 Institute of Technology (KIT), Garmisch-Partenkirchen, Germany

10  
11  
12  
13 \*Corresponding author: sfrancoluesma@gmail.com

14  
15  
16  
17 Keywords:

18 Greenhouse gas emissions; manual chamber system; automated chamber system  
19  
20  
21  
22

23 Abstract

24 Over the last decades and due to the current climate change situation, the study of the  
25 impacts of human activities on climate has reached great importance, being agriculture one  
26 of the main sources of soil greenhouse gas. There are different techniques to quantify the  
27 soil gas fluxes, such as micrometeorological techniques or chamber techniques, being the  
28 last one capable to assess different treatment at the same site. Manual chambers are the  
29 most common one. However, manual chambers are characterised by low sampling  
30 frequency, typically one sample per day is considered a high sampling frequency.  
31 Therefore, a great deal of effort is required to monitor short-term emission events such as  
32 fertilisation or rewetting. For this reason, automated chamber systems are an opportunity  
33 to improve soil gas flux determination, but their distribution is still scarce due to the cost  
34 and challenging technical implementation. The objective of this study was to develop an  
35 automated chamber system for agricultural systems ~~under Mediterranean conditions and~~  
36 ~~compare it with a manual chamber system. A comparison between manual and automated~~  
37 ~~chamber systems was conducted to evaluate the soil gas fluxes obtained by the automated~~  
38 ~~system.~~ Moreover, over a period of one month the soil gas fluxes were determined by both  
39 systems to compare their capabilities to capture the temporal variability of soil gas  
40 emissions. The automated system reported soil GHG fluxes up to 58 and 40% greater for  
41 CO<sub>2</sub> and N<sub>2</sub>O fluxes compared to the manual chamber system. Additionally, the higher  
42 sampling frequency of the automated chamber system allowed to capture the daily flux  
43 variations, resulting in a more accurate estimation of cumulative soil gas emissions. The  
44 study emphasises the importance of chamber dimension and shape in the development of  
45 chamber systems, as well as sampling frequency and sampling hour, especially when  
46 manual chamber system is the selected measurement system.

47 **1. Introduction**

48 Agriculture and land-use changes are significant contributors to climate change, accounting  
49 for a 22% of total global emissions of greenhouse gases (GHG) (IPCC, 2023). Moreover,  
50 agricultural emissions are expected to increase along with food demand (Wiebe et al., 2019).  
51 Microbial activity is the primary driver of the production and emission of different soil GHG.  
52 Microbial processes are influenced by several abiotic factors such as soil water content, soil  
53 temperature or nutrient availability. The different farming practices – i.e. crop rotation,  
54 fertilization, irrigation – have a significant impact on these factors, and, therefore, they can have a  
55 great influence on soil GHG emissions (Oertel et al., 2016). By accurately measuring soil GHG  
56 emissions, it is possible to identify the major sources and understand the impact associated with  
57 various farming practices. This valuable information can be provided to policymakers and  
58 regulators to develop science-based policies and regulations that incentivize farmers to adopt more  
59 sustainable practices. Thus, measuring soil GHG emissions in agriculture is crucial to promote  
60 sustainable farming practices, that can mitigate climate change.

61 The use of manual chambers is one of the most widespread methods for studying soil GHG  
62 emissions at small spatial and temporal scales (Collier et al., 2014). Chambers are designed to  
63 establish an enclosed environment, facilitating the periodic collection of gases emitted from or  
64 consumed in the soil using syringes. Subsequently, the gathered gas samples are subjected to  
65 laboratory analysis through gas chromatography (Harvey et al., 2020). These analyses determine  
66 the concentration of GHG within the chamber headspace and allow the calculation of emission  
67 rates based on the change in gas concentration over a given time span. This method is characterized  
68 by its simplicity and versatility as chambers are relatively simple to use and can be employed  
69 across diverse ecosystems and soil types (de Klein et al., 2020). Manual chambers are relatively  
70 simple to construct and can be tailored to fit specific research requirements. Besides, compared to  
71 alternative methods, they entail relatively low cost. However, they have as well some limitations.

72 For instance, their measurement frequency is restricted due to the time-intensive nature of manual  
73 sampling and subsequent analysis, making high-frequency sampling impractical. Usually,  
74 sampling frequency is not higher than one sampling per day, but it's well established that sampling  
75 frequency affects annual GHG estimations (Barton et al., 2015). For this reason, efforts are often  
76 concentrated on intense sampling frequencies during short periods (hours to days) when significant  
77 emissions peaks are expected, but later, during the rest of the campaign, samplings are carried out  
78 every 1 to 4 weeks (or even sometimes not considered). Another aspect to consider involves the  
79 notable soil disruption caused when samples need to be collected, such as after an irrigation event.

80 In contrast to manual chambers, the utilization of automated chambers coupled with an in-  
81 situ gas analyser allows sampling at a higher temporal frequency. Consequently, these automated  
82 systems more comprehensively capture temporal variations, enhancing insight into the dynamics  
83 of soil GHG emissions on a daily and seasonal basis (Grace et al., 2020). Automation also ensures  
84 capturing fluxes linked to unexpected events (such as rainstorms), obtaining data in areas of  
85 difficult access, and reducing the impact of soil disturbance on measurements. **However, this**  
86 **method requires costly equipment and skilled operators and implies different infrastructure**  
87 **constraints, factors that result in lower spatial coverage compared to what can be achieved with**  
88 **manual systems. Moreover, these automated chamber systems are beginning to be manufactured**  
89 **and distributed by companies dedicated to the manufacture of gas analysers, with the limitation of**  
90 **being close systems to be modified. Based on that situation, over recent decades, several groups**  
91 **have crafted automated systems (Lognoul et al., 2017, Lawrence and Hall, 2020).**

92 To date, the number of experiences using automated chambers coupled with in situ gas  
93 analysers is scarce and, as far as we have been able to find out, none of these previous studies used  
94 chamber systems consisting of a total of 12 individual chambers. The objective of this paper is to  
95 present an innovative non-commercial soil GHG measurement system based on automated  
96 chambers linked to an in situ photoacoustic multigas analyser and describe its operational details.

97 A, a comparison between this automated system and the manual static chamber methodology is  
98 also presented.

## 99 2. Materials and Methods

### 100 2.1. Automated system description

101 In this section, we present an automated chamber system tailored for monitoring soil gas  
102 emissions. By integrating openness, cost-effectiveness, and versatility, this system facilitates  
103 precise and dynamic measurements of soil GHG fluxes. Our design principles focused on building  
104 an adaptable configuration and real-time functionality, alluding to its potential importance in  
105 agricultural and environmental research. The system consists of three main parts: the chambers,  
106 the set of solenoid valves controlled by a computer (central control unit) and the multigas analyser  
107 (Figure 1).

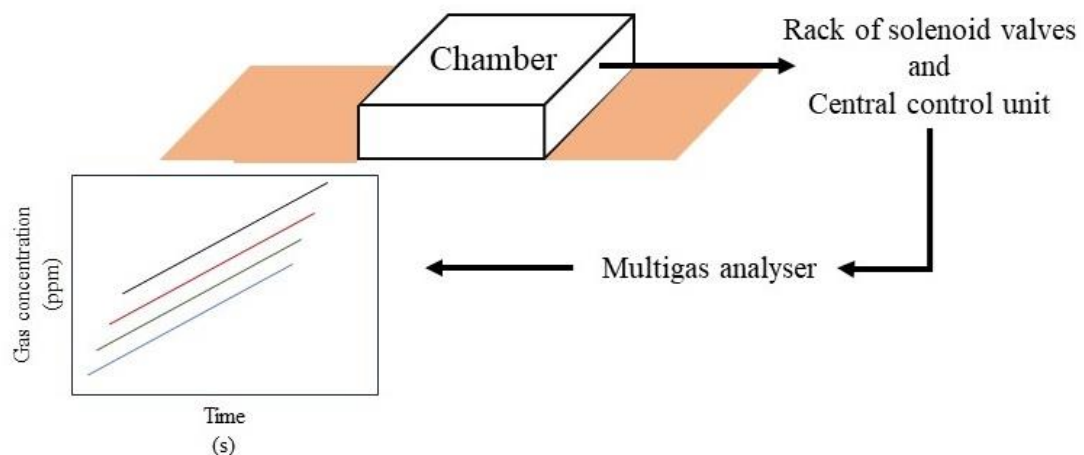

108  
109 Figure 1. General scheme of the automated soil GHG measuring system.  
110

### 111 2.2. Soil chamber design

112 Soil chambers, ‘Queensland’ design, have been built following a model provided by the  
113 Terrestrial Bio-Geo-Chemistry Division (Institute of Meteorology and Climate Research, Atmos.  
114 Environ.al Research (IMK-IFU), Karlsruhe Institute of Technology (KIT)). Chambers consisted  
115 of an aluminum structure of 0.50 x 0.50 m length and width and 0.15 m height closed with



116 methacrylate panels and two lids 0.50 x 0.25 m width and length that are controlled by four  
117 pneumatic actuators, two per lid (Figure 2a). Besides, lids open at a 90° angle allowing rainfall or  
118 irrigation water supply to reach the soil surface of the area covered by the chambers. All  
119 methacrylate panels were coated with an aluminum bubble foil to keep the internal chamber  
120 temperature homogeneous during the enclosure time. Moreover, a rubber seal was fixed to the lids  
121 and the bottom part of each chamber to ensure a hermetic close and avoid gas leakage during the  
122 sampling process.

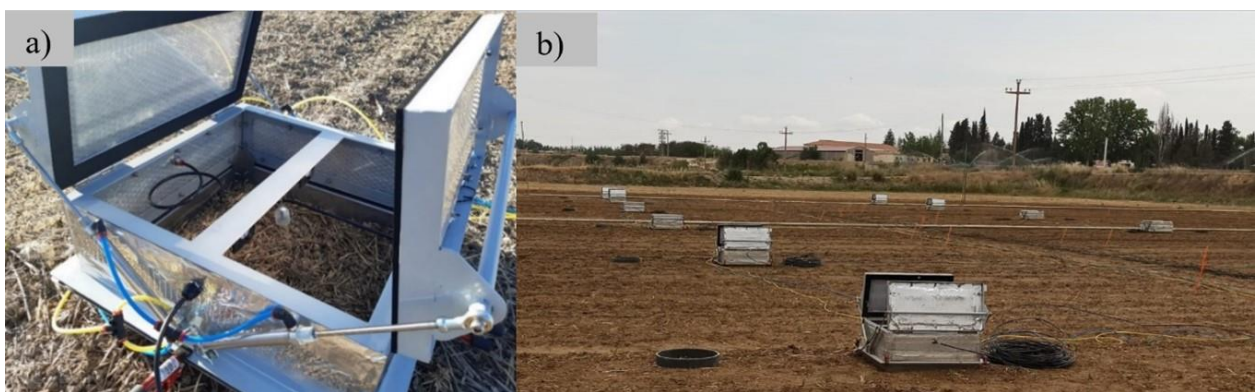

123  
124 Figure. 2. (a) Open automated chamber deployed in the field trial ('Queensland' design). (b) Set  
125 of chambers deployed in the field trial. Dark rings next to chambers are the bases for manual  
126 chambers.  
127

128 The gas sample line (polyethylene coated aluminum tube, Eaton Sinflex. 6/4mm external  
129 internal diameter, respectively) entered each chamber via one of the side panels, positioned  
130 approximately halfway up. In the central area of the chamber, the tube was bent facing downwards  
131 and the tip was protected by a small PVC funnel to prevent water condensation at the tube inlet. A  
132 vent (matching the material and diameter of the gas sampling line) was positioned on the opposite  
133 side panel to equalize pressure between the chamber's interior and exterior during flux  
134 measurements. Moreover, each chamber has two small fans (60x60x25 mm 12V; 4000 rpm.  
135 EVERCOOL EC6025L12EA) to promote air mixing inside the chamber.

136

137 Three chambers were equipped with a threaded cable gland on a lateral methacrylate panel  
138 for mounting a thermistor (107, Campbell Scientific Ltd., UK) to monitor internal chamber  
139 temperature. Chambers were attached by clamps to stainless steel bases (0.5 x 0,5 x 0.1 m) with  
140 sharp edges at the bottom that were inserted 0.10 m into the soil . Plants (crop and weeds) growing  
141 inside the chambers were cut since the crop during this experiment was maize (*Zea mays* L.)  
142 (Figure 2b). The cost of each chamber, including the solenoid valve and the sampling line is 600  
143 €.

### 144 ***2.3. Automated chamber operation***

145 The chambers opened and closed by means of pneumatic actuators. This setup comprised  
146 an air compressor delivering pressure to the pneumatic actuators. Inside a shed located next to the  
147 field trial, three solenoid valves installed in a panel, received air from the compressor (6 bar) and  
148 directed compressed air to the chambers. Routing of compressed air was facilitated by an external  
149 relay controller (8 relay board, 24V 6.5A, YWBL-WH) directly linked to the computer. In the  
150 configuration of this study, three sets of four chambers each opened and closed simultaneously.  
151 Similarly, each sampling line from each chamber was connected to a two-way solenoid valve that  
152 regulated the entry of the gas sample from each of the chambers to the photoacoustic multi-gas  
153 analyser (Gasera One, Gasera Ltd, Finland). The two-way solenoid valves were connected to a  
154 relay board (16 relay board, 24V 6.5A, YWBL-WH) that controlled which valve was activated  
155 (Figure 3).

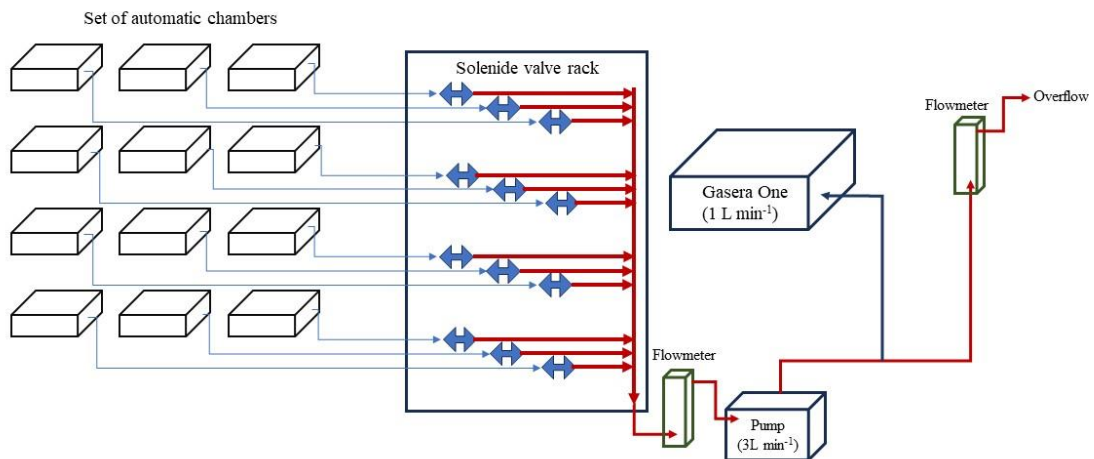

156  
 157 Figure. 3. Description of the automated chamber system.

158  
 159 To bring the gas from the chamber to the gas analyser, an external diaphragm pump (KNF  
 160 NMP830KNDC 12V, KNF Neuberger, Inc, Freiburg im Breisgau, Germany) was coupled to the  
 161 two-way solenoid valve bank. This pump continuously drew air from the activated sampling line,  
 162 maintaining a flow rate of  $3\text{L min}^{-1}$ . The gas analyser (Analysis cell volume 30 mL) drew sample  
 163 gas from this primary line at a rate of  $1\text{ L min}^{-1}$  for a duration of six seconds every one and a half  
 164 minutes (Figure 3c). Two flowmeters were attached to the main line. The initial one, positioned  
 165 after the pump and preceding the gas analyser, regulated the gas flow delivered to the analyser.  
 166 The second flowmeter ensured a continuous overflow greater than  $1\text{ L min}^{-1}$ , guaranteeing  
 167 sufficient gas flow from the active sampling line to the gas analyser (Figure 3).

168 The solenoid valve banks, pneumatic system, chamber sampling lines, and gas analyser  
 169 were all managed through a custom script created using R statistical software version 4.2.2 (R  
 170 Core Team, 2022). This R script, governed by the time taken by the analyser to process the sample,  
 171 can be easily modified by setting the total number of chambers or, if it is necessary to work by  
 172 blocks, by setting the number of blocks and the number of chambers per block. One of the  
 173 advantages of this system is the self-made multiplexer that allows to modify the number of

174 chambers easily compared to other multiplexers like Gasera Multipoint Sampler (Gasera Ltd,  
175 Finland) which has a close configuration of 8 or 12 channels. Moreover, the use of relay boards  
176 that could be configured by Arduino or easily integrated into the R script as the selected ones, as  
177 an alternative to control modules, for example, I-7060D (ICP DAS CO, LTD) that only have four  
178 channels per module, simplifies the configuration of the script, since just with one board it's  
179 possible to handle all the chambers. For this field experiment, the current setup consists of 3 blocks  
180 of four chambers each block. This configuration responds to the needs of the current experimental  
181 design, however, since it is an open system, the configuration is variable and can be individualised  
182 for each of the chambers.

183

#### 184 *2.4. Evaluation of the automated measurement system*

185 Over the last decade, the current research team members have successfully conducted  
186 several GHG flux studies using a manual closed chamber system (Álvaro-Fuentes et al., 2016,  
187 Franco-Luesma et al., 2019,2020a, 2020b, 2022). Based on that, an evaluation experiment was  
188 carried out to compare the soil gas fluxes obtained via the newly developed automated chamber  
189 system against the conventional manual chamber system used regularly by the research group.  
190 This evaluation experiment was aimed to evaluate the impact of i) the chamber design and ii) the  
191 sampling frequency and time on the differences in soil GHG fluxes between a manual and an  
192 automated chamber measurement system.

193 Manual chambers consisted of a Polyvinyl Chloride (PVC) cylinder of 0.315 m diameter  
194 and 0.2 m height coated by white thermal paint to avoid internal air temperature increasing during  
195 the deployed time. Each chamber was placed same diameter PVC collar inserted 0.05 m into the  
196 soil. A rubber septum was affixed atop the chamber to enable gas sampling via a plastic syringe  
197 equipped with a needle. Gas samples from each chamber were transferred to a 12 mL pre-  
198 evacuated glass vial (Exetainer Labco®). The concentrations of CO<sub>2</sub>, CH<sub>4</sub> and N<sub>2</sub>O in the gas

199 samples were determined by gas chromatography Agilent 7890B (Agilent, Santa Clara, CA,  
200 United States) equipped with an autosampler (PAL3 autosampler, Zwingen, Switzerland). Soil gas  
201 fluxes were determined based on the increase of the gas concentration during the deployment  
202 period. Further details of the gas chromatography method and manual chamber design could be  
203 found in Franco-Luesma et al. (2022).

204 The evaluation experiment took place in a maize (*Zea mays* L.) field trial sown on  
205 10/05/2023 under irrigation conditions. The soil is a *Typic Xerofluvent* (Soil Survey Staff, 2015)  
206 with a silty loam texture, characterized by a basic pH of 8, a calcium carbonate content (CaCO<sub>3</sub>)  
207 of 48%, a total organic carbon content of 0.6% and a bulk density of 1.33 g cm<sup>-3</sup> in the first 0.25  
208 m soil depth. The area is characterized by a Mediterranean semiarid climate with a mean annual  
209 air temperature of 14.1 °C, mean annual precipitation of 298 mm and mean annual reference  
210 evapotranspiration (ET<sub>o</sub>) of 1,243 mm. **The meteorological data were obtained from a**  
211 **meteorological station situated at 0.5 km from the experimental site.**

212 The evaluation experiment had two different steps. The first step consisted of simultaneous  
213 gas sampling with both manual and automated chamber systems on four different dates (i.e.  
214 19/06/2023, 20/06/2023, 21/06/2023 and 28/06/2023). On June 19<sup>th</sup> and 20<sup>th</sup>, chambers were  
215 sampled once during 06:00 to 07:30 GMT. On June 21<sup>st</sup> and June 28<sup>th</sup>, chambers were sampled  
216 four times between 06:00 to 12:00 GMT. Consequently, a total of ten samplings were performed,  
217 covering four different days and different hours of the day to capture the possible diurnal variation  
218 of soil gas emission.

219  
220 In this short time experiment, two chambers of each block were selected to compared with  
221 the manual chambers. The sampling sequence for the automated system was programmed to  
222 sample each chamber every five minutes, with a total enclosure time of 28 minutes. However, due

223 to the sequence configuration, the computable time for determining the soil gas fluxes was 20  
224 minutes as described in the sequence diagram (Figure S1). The two manual chambers of each block  
225 were closed at the same time as the automated chamber and gas sampling was done at time 0 (first  
226 automated chamber sampling), at time 10 minutes and at time 20 minutes (coinciding with the last  
227 automated chamber sampling).

228       The second step of the evaluation experiment consisted of assessing the impact of the  
229 sampling time (i.e. hour of the day) and sampling frequency (i.e. 16 daily measurements vs 1 daily  
230 measurement for the automated and the manual chamber system, respectively) on the estimation  
231 of the soil gas fluxes. For that propose, from 22 of May 2023 to 29 of June 2023, soil CO<sub>2</sub>, CH<sub>4</sub>  
232 and N<sub>2</sub>O fluxes were measured simultaneously by the manual and automated chamber systems in  
233 the same field experiment

234       During this period, the sampling frequency and configuration of the automated chamber  
235 system was the same as it was used during the step one of the evaluation experiments. The twelve  
236 chambers were grouped in three set of four chambers each, being sampling every five minutes for  
237 28 minutes, resulting in a total of 5 sampling points per chamber (Figure S1). However, the  
238 procedure followed in the manual chamber system was different and it consisted of the collection  
239 of three gas samples at time 0, 20 and 40 minutes after closing the chamber. The sampling  
240 frequency followed a daily frequency over the first five days and, afterwards, weekly  
241 measurements till the end of the experiment. For both chamber systems, the measuring instrument  
242 (i.e. photoacoustic multi-gas analyser and gas chromatography for automated and manual chamber  
243 systems, respectively) were calibrated by using 4 different ultra-high purity gas standards  
244 (Carbueros Metálicos, Barcelona, Spain, standard 1, 400 ppm CO<sub>2</sub>, 1.5 ppm CH<sub>4</sub>, 0.3 ppmN<sub>2</sub>O,  
245 standard 2, 800 ppm CO<sub>2</sub>, 2 ppm CH<sub>4</sub>, 1 ppmN<sub>2</sub>O, standard 3, 1500 ppm CO<sub>2</sub>, 4 ppm CH<sub>4</sub>, 3  
246 ppmN<sub>2</sub>O, standard 4, 3000 ppm CO<sub>2</sub>, 6 ppm CH<sub>4</sub>, 6 ppmN<sub>2</sub>O) in order to standardize the  
247 concentration values obtained.

248

## 249 **2.5. Data analysis**

250 Soil gas flux (mg of gas m<sup>2</sup> day<sup>-1</sup>) of CO<sub>2</sub>, CH<sub>4</sub> and N<sub>2</sub>O, i.e.,  $f_{CO_2}$ ,  $f_{CH_4}$  and  $f_{N_2O}$  was  
251 calculated using the following equation (Eq. 1)

$$252 \quad f_{gas} = \frac{Fit * MW * p * h}{R * T} * fT * fU \quad (Eq.1)$$

253 where *Fit* represents the linear increase of gas concentration in the chamber over the  
254 enclosure time, *MW* is the molar weight of the atom in the gas molecule (i.e. 12 g mol<sup>-1</sup> for CO<sub>2</sub>-  
255 C and CH<sub>4</sub>-C and 28 g mol<sup>-1</sup> for N<sub>2</sub>O-N), *p* is the atmospheric pressure in Pa, *h* is the chamber  
256 height in m, *R* is the ideal gas constant in J K<sup>-1</sup> mol<sup>-1</sup>, *T* is the chamber air temperature in K, *fT* is  
257 the correction factor of time units, 1440 minutes day<sup>-1</sup> and *fU* is the unit correction factor, 10<sup>3</sup>.  
258 Cumulative soil CO<sub>2</sub>, CH<sub>4</sub> and N<sub>2</sub>O emissions were calculated using the trapezoid rule (Levy et  
259 al., 2017). Comparison between systems was done by linear fitting considering only soil gas fluxes  
260 that presented a R<sup>2</sup> higher than 0.8. Moreover, comparison in cumulative emissions between  
261 chamber system over one month was evaluated by one-way ANOVA. All analyses were done  
262 using the R statistical software version 4.2.2 (R Core Team, 2022).

263

### 264 3. Results and Discussion

#### 265 3.1. Automated system comparison

266 The comparison between the automated and manual measurement systems showed a linear  
267 response for the three gases compared. In the case of soil CO<sub>2</sub>, the automated system presented an  
268 average flux 58% greater compared to the manual system with a minimal flux difference of 425  
269 mg CO<sub>2</sub>-C m<sup>2</sup> day<sup>1</sup> (Figure 4a). Data exhibited moderate dispersion ( $R^2=0.60$ ) revealing increased  
270 accuracy when manual fluxes were greater than 500 mg CO<sub>2</sub>-C m<sup>2</sup> day<sup>1</sup> (Figure 4a). Regarding  
271 CH<sub>4</sub> fluxes, the automated chamber system showed values greater than the fluxes obtained in the  
272 manual chamber system, showing a better fitting when fluxes were positive (Figure 4b). However,  
273 the lowest data dispersion between both measurement systems was obtained for soil N<sub>2</sub>O fluxes  
274 ( $R^2 > 0.87$ ) but as observed for the other two gases, the automated chamber system reported fluxes  
275 values 40% greater than the manual chamber system (Figure 4c).



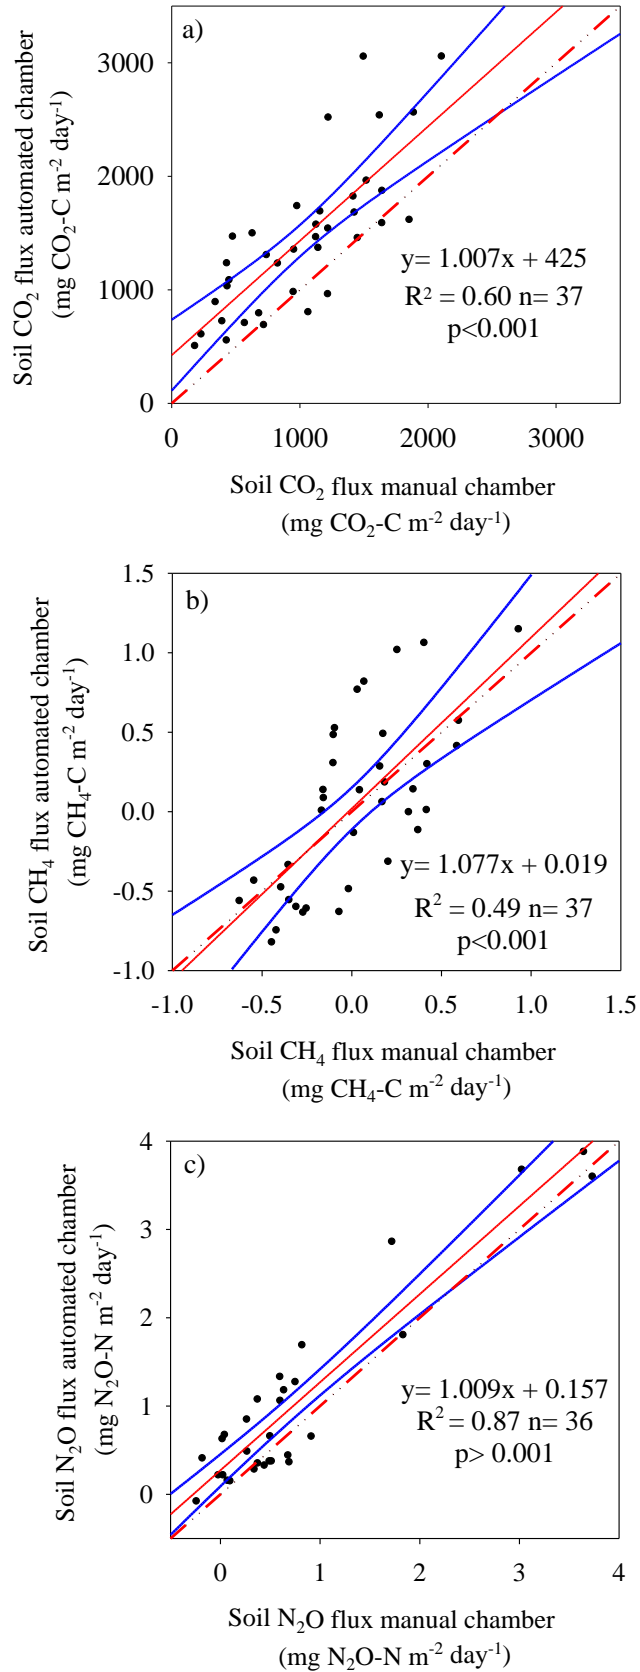

276  
 277 Figure 4. Comparison of soil gas flux between automated and manual chamber systems for carbon  
 278 dioxide (CO<sub>2</sub>) fluxes (a), methane (CH<sub>4</sub>) fluxes (b) and nitrous oxide (N<sub>2</sub>O) fluxes (c). Blue solid  
 279 lines represent 95% confidence intervals. Red dotted lines represent 1:1 line.  
 280

281           These differences between both measurement systems in flux magnitude and for the three  
282 studied gases may probably be a consequence of the different chamber shapes and dimensions ~~that~~  
283 ~~presented both systems~~. Hoffmann et al. (2018) found that the shape and dimension of the chamber  
284 have a significant effect on CO<sub>2</sub> fluxes, observing that small and cylindrical chambers tend to  
285 result in higher underestimation of CO<sub>2</sub> fluxes compared with large and squared chambers. In line  
286 with the previous authors, Pihlatie et al. (2013) also found a significant effect of the chamber shape  
287 and dimension on soil CH<sub>4</sub> flux determination. Similarly, Rochette and Eriksen-Hamel (2008) also  
288 concluded that chamber shape and dimensions are critical factors in the estimation of GHG fluxes.

289           All previous studies agreed that the area/perimeter ratio is a key factor in soil gas flux  
290 estimation and, hence, they recommended a ratio greater than 0.10 m (Clough et al., 2020). In our  
291 work, the two types of chambers compared presented different area/perimeter ratios with values  
292 of 0.125 and 0.089 m for the automated and the manual chamber systems, respectively. This  
293 difference in the area/perimeter ratio could explain the greater CO<sub>2</sub>, CH<sub>4</sub> and N<sub>2</sub>O fluxes measured  
294 by the automated chamber system compared with the manual system. Moreover, the use of fans to  
295 mix the internal air of the automated chambers might have also explained the higher fluxes  
296 measured in this system compared with the manual system. Air-mixing by fans is **highly**  
297 recommended to homogenize the internal air of the chamber, ensuring that the air sample aliquot  
298 is representative of the chamber headspace air (Clough et al., 2020).

299           In line with the previous explanation, the Minimum Detectable Flux (MDF) following the  
300 equation presented by Nickersen (2016) was calculated for methodologies. The MDF method not  
301 only considered the accuracy of the analyser but also considered the area and volume of the  
302 chamber and the enclosure time, factors that are different between both methodologies compared  
303 in this work. The MDFs for the automated chamber system were 1.209 mg CO<sub>2</sub>-C m<sup>-2</sup> day<sup>-1</sup>, 0.012  
304 mg CH<sub>4</sub>-C m<sup>-2</sup> day<sup>-1</sup> and 0.059 mg N<sub>2</sub>O-N m<sup>-2</sup> day<sup>-1</sup>, while for the manual chamber system, MDFs  
305 values were 14.050 mg CO<sub>2</sub>-C m<sup>-2</sup> day<sup>-1</sup>, 0.143 mg CH<sub>4</sub>-C m<sup>-2</sup> day<sup>-1</sup> and 0.071 mg N<sub>2</sub>O-N m<sup>-2</sup> day<sup>-1</sup>

306 <sup>1</sup>. MDF was greater for the automated chamber system for the three gases, considering a similar  
307 enclosure time of 20 minutes and an average air temperature during the experiment of 20° C. The  
308 differences in MDF found between both methodologies was another factor that explained the  
309 greatest fluxes values observed under the automated chamber system.

310

### 311 ***3.2. Sampling time and frequency comparison***

312 The effect of sampling time and frequency on cumulative soil gas emissions was compared  
313 between the automated and the manual measuring systems. This analysis was performed during  
314 one month in which the automated chamber system ran continuously over the entire month, while  
315 in the manual chamber system sampling was only performed on nine different dates.

316 As expected, the automated chamber system was able to capture daily flux fluctuations, a  
317 fact that was not possible for the manual chamber system, because only one gas sampling was  
318 done for each of the selected dates (Figure 5). However, when fluxes temporal dynamics for each  
319 gas were evaluated, it had been observed differences for each gas.

320

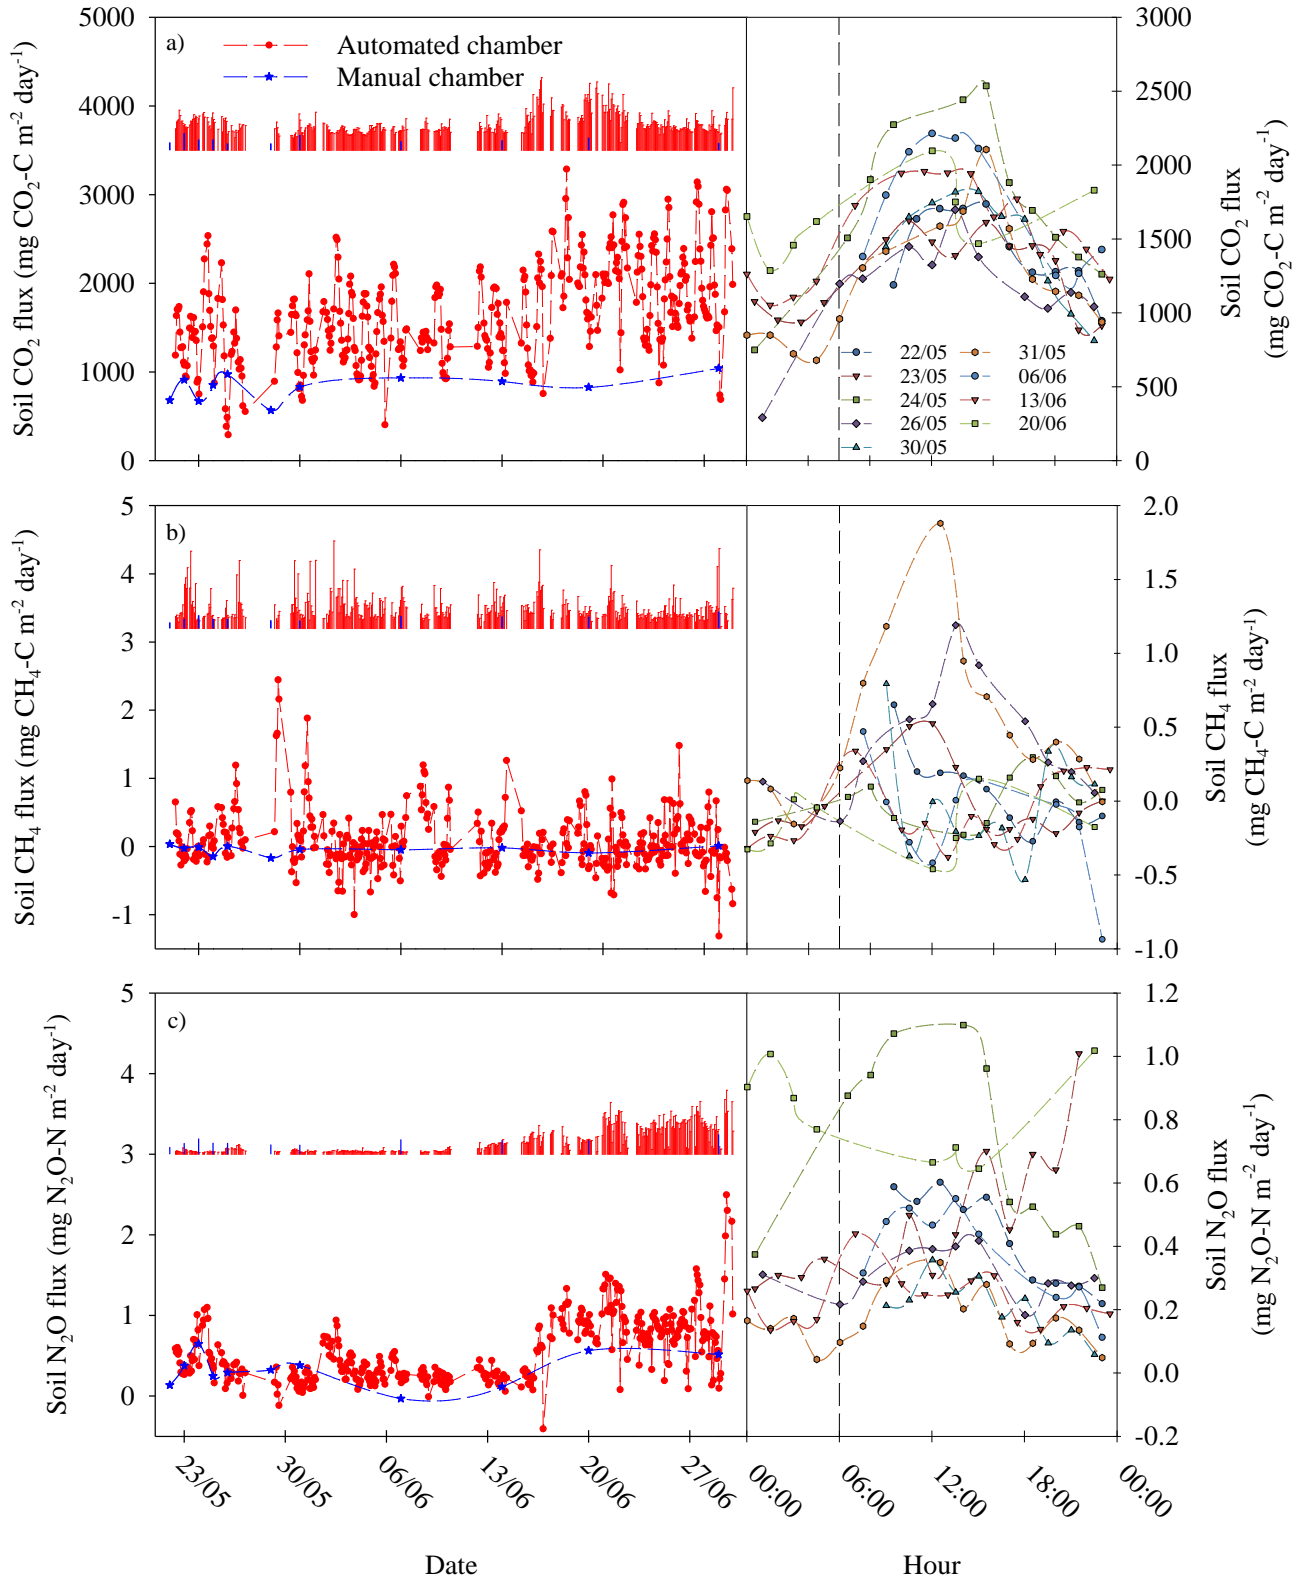

321  
 322  
 323  
 324  
 325  
 326  
 327

Figure 5. Comparison of soil gas flux and cumulative soil gas emissions between the automated (red line and bar) and the manual (blue line and bar) chamber system for carbon dioxide (CO<sub>2</sub>) fluxes (a), methane (CH<sub>4</sub>) fluxes (b) and nitrous oxide(N<sub>2</sub>O) fluxes (c). Vertical solid lines represent standard error SE (left panel) and daily soil flux of the automated chamber systems on nine different dates Vertical dotted line indicates manual sampling hour (i.e., 6 GMT) (right panel).

328 Soil CO<sub>2</sub> and CH<sub>4</sub> fluxes determined by the manual chamber system showed similar  
329 behaviour, presenting a low variation in the fluxes magnitude over the evaluated period, being  
330 more pronounced for soil CH<sub>4</sub> fluxes (Figure 5a, 5b). For example, this was clearly observed in  
331 the CH<sub>4</sub> in which the automated system captured flux peaks greater than 2 mg CH<sub>4</sub>-C m<sup>-2</sup> day<sup>-1</sup>  
332 while the manual fluxes were close to 0 mg CH<sub>4</sub>-C m<sup>-2</sup> day<sup>-1</sup> over the entire measuring period  
333 (Figure 5b). Interestingly, the manual system was able to capture the temporal emission trend  
334 shown by the automated system for soil N<sub>2</sub>O fluxes, the gas that showed the greatest temporal  
335 variability over the period studied (Figure 5c).

336 Moreover, when the daily emission pattern of the automated chamber was evaluated for  
337 the manual sampling dates, it was observed that soil CO<sub>2</sub> fluxes presented the maximum fluxes  
338 rate between 12:00 and 16:00 GMT, a daily pattern similar to the results reported by Pumpanen et  
339 al. (2003) and Yu et al. (2013). The maximum soil CO<sub>2</sub> fluxes of one day were a factor of three  
340 higher than the minimum fluxes measured (Figure 5a). Differences between the maximum and the  
341 minimum CH<sub>4</sub> fluxes were lower since soil CH<sub>4</sub> fluxes only ranged between -0.5 to 0.5 mg CH<sub>4</sub>-  
342 C m<sup>-2</sup> day<sup>-1</sup> for most of the nine selected dates, expected for May 26<sup>th</sup> and 31<sup>st</sup> when soil CH<sub>4</sub>  
343 fluxes above 1 mg CH<sub>4</sub>-C m<sup>-2</sup> day<sup>-1</sup> were observed at midday (Figure 5b).

344 Soil N<sub>2</sub>O fluxes also presented a daily emission pattern characterized by reaching the  
345 maximum soil N<sub>2</sub>O from 08:00 to 16:00 GMT and the minimum during nighttime, but not being  
346 as clear as emission pattern observed for soil CO<sub>2</sub> fluxes (Figure 5c). This daily emission pattern  
347 was also observed by Wu et al. (2021) in a metanalysis which evaluated global daily N<sub>2</sub>O emission  
348 patterns. A possible explanation to the daily pattern observed in all three gases would be the  
349 temperature dependence of the biological process that governs the production and emission of soil  
350 GHG (Lloyd and Taylor, 1994, Smith and Dobbie, 2001, Davidson and Janssens, 2006.). This  
351 dependence would explain the higher emissions observed during daytime compared to nighttime  
352 (Fig. 5c).

353 Based on the daily emissions pattern observed, right panels of Figure 5, the time of  
354 sampling can have a very high impact on the gases flux estimation for manual chambers systems,  
355 especially when only one sampling is done per day. For CO<sub>2</sub> emissions, carried out the manual  
356 sampling at 06:00 GMT suppose and underestimation of 43% respect to the mean daily flux  
357 estimated over 24 hours with automated chamber system. Average soil CO<sub>2</sub> fluxes determined  
358 with the manual chamber system over the nine dates was 836 mg CO<sub>2</sub>-C m<sup>-2</sup> day<sup>-1</sup>, while the 24  
359 hours CO<sub>2</sub> flux for the same nine date measuring with the automated chambers system was 1469  
360 mg CO<sub>2</sub>-C m<sup>-2</sup> day<sup>-1</sup>. In contrast, sampling hour had a minimum impact on soil CH<sub>4</sub> fluxes,  
361 obtaining the similar average flux in both systems, 0.066 and 0.068 836 mg CH<sub>4</sub>-C m<sup>-2</sup> day<sup>-1</sup> for  
362 the manual and the automated chamber system, respectively.

363 Regarding N<sub>2</sub>O emissions, 06:00 GMT resulted in an adequate sampling hour to obtain a  
364 representative daily emission. Average soil N<sub>2</sub>O flux of the nine manual sampling was 0.38 mg  
365 N<sub>2</sub>O-N m<sup>-2</sup> day<sup>-1</sup>, while the daily average for the same nine dates estimated with the automated  
366 chamber system was 0.41 mg N<sub>2</sub>O-N m<sup>-2</sup> day<sup>-1</sup>, resulting the fluxes determined with the manual  
367 chambers in an underestimation of 7% compared to the N<sub>2</sub>O fluxes determined with the automated  
368 chambers.

369 The cumulative soil gas emissions of the three gases tended to be greater for the automated  
370 than the manual measuring system (Fig. 6). For example, cumulative soil CO<sub>2</sub> emissions presented  
371 significant differences between both sampling systems. The automated chamber system showed  
372 average values 16% more than the manual chamber system (Fig 6a). Indeed, this difference was  
373 even greater in CH<sub>4</sub> (more than 3-fold greater cumulative emissions in the automated than in the  
374 manual measuring system, Fig. 6b). Cumulative CH<sub>4</sub> emissions showed positive values for the  
375 automated chamber system while the average value for the manual chamber system was negative.  
376 However, the variability observed for the manual chamber system was 10 times greater rather than  
377 for the automated chamber system, a fact that resulted in the absence of significant differences

378 between both sampling systems. Cumulative soil N<sub>2</sub>O emissions did not show significant  
 379 differences between sampling systems despite that the average cumulative N<sub>2</sub>O emissions were  
 380 20% greater for the automated chamber system (Fig. 6c). As occurred with cumulative CH<sub>4</sub>  
 381 emissions, the manual chamber system showed a greater variability than the automatic chamber  
 382 system, reason that could explain the absence of significant differences between sampling systems.

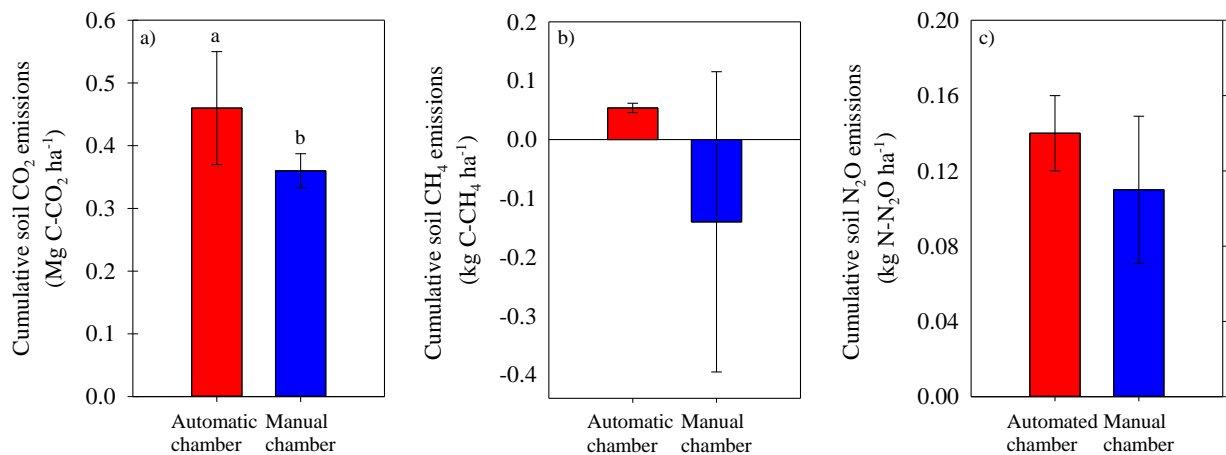

383  
 384 Figure 6. Comparison of soil cumulative soil gas emissions between the automated (red bar) and  
 385 the manual (blue bar) chamber system for carbon dioxide (CO<sub>2</sub>) (a), methane (CH<sub>4</sub>) (b) and nitrous  
 386 oxide(N<sub>2</sub>O) (c). Error bars represent standard error. Different letters indicate significant  
 387 differences at p < 0.05.  
 388

389 Differences in the different cumulative emissions found between measuring systems might  
 390 have been explained by the next three points: (i) construction differences, (ii) the sampling time in  
 391 the manual system, and (iii) the height/enclosure time ratio (Clough et al., 2020). The automated  
 392 chamber presented higher area/perimeter ratios and air-mixing by fans which could contribute to  
 393 the greater fluxes found in this system compared with the manual system. Regarding the sampling  
 394 time, this was especially critical for CO<sub>2</sub>. Manual sampling was performed at 06:00 GMT (08:00  
 395 am, GMT+2), resulting in an underestimation of the average daily emission (Pumpanen et al.,  
 396 2003, Yu et al.,2013). In contrast, for N<sub>2</sub>O, underestimation was lower since 06:00 GMT is  
 397 considered a sampling time close to the optimal time for this gas (Wu et al., 2021). Finally,  
 398 height/enclosure time ratio is also an important factor that affect the sensibility of the flux  
 399 determination. As a recommendation, height/enclosure time ratio greater than 0.40 m hour<sup>-1</sup> is

400 suggested to increase the minimum detectable flux and to reduce the impacts on air humidity,  
401 temperature and the gas diffusion process, variables that govern the soil gas fluxes between soil  
402 and atmosphere (Clough et al., 2020). In our study, the automated system resulted in  
403 height/enclosure ratios of  $0.60 \text{ m hour}^{-1}$ , while in the manual system the ratios dropped to  $0.30 \text{ m}$   
404  $\text{hour}^{-1}$ , explaining the lower cumulative emissions reported by the manual system.

405

#### 406 **4. Conclusion**

407 The presented system features an open design, cost-effective components, and adaptable  
408 configuration, offering benefits in flexibility, compatibility, and affordability, which in the end  
409 resulted in a more precise monitoring of the time flux variability. Moreover, it has been highlighted  
410 that the shape, dimension, and configuration of the chamber system are critical factors that must  
411 be considered in the design of the chambers, being critical in setting area/perimeter and  
412 height/enclosure time ratios greater than  $0.10\text{m}$  and  $0.40\text{m h}^{-1}$ , respectively. Likewise, in case there  
413 is not option to implement an automated system, the sampling time of the manual measuring  
414 system is critical resulting in significant over or underestimation. Our results showed that  
415 06:00GMT was an optimal sampling time for soil  $\text{N}_2\text{O}$  emissions but resulted in an  
416 underestimation of soil  $\text{CO}_2$  and  $\text{CH}_4$  emissions. Therefore, based on the results presented in this  
417 work, automated chamber systems are a powerful tool for quantifying GHG fluxes from the soil,  
418 allowing to capture the large temporal variability that characterizes them. Moreover, open  
419 configuration systems, such as the one presented in this study, are more suitable for use in  
420 agricultural systems, allowing the number of chambers to be easily modified to cover as much  
421 variability as possible.

422



423 **Data availability**

424 All raw data can be provided by the corresponding authors upon request.

425

426 **Author contributions**

427 SF-L: Conceptualization, formal analysis, software, data acquisition, writing—original draft, data  
428 curation, methodology, formal analysis, investigation. MA-A: Conceptualization, methodology,  
429 writing—review; editing. BW: Writing—review. BL: Conceptualization ,methodology, software,  
430 writing—review, funding acquisition. JA-F: Conceptualization ,methodology, writing—review;  
431 editing, supervision, project administration, resources, funding acquisition

432

433 **Competing interests**

434 The authors declare that they have no conflict of interest.

435

436 **Acknowledgements**

437 We are grateful to Valero Pérez Laguardia for assistance in the in the development,  
438 construction and maintenance of the manual and automated chamber systems.

439 **Financial support**

440 This work was supported by the project AgriGEI funded by the Regional Government of  
441 Aragon (“Proyectos de I+D+i en líneas prioritarias del Gobierno de Aragón”, Ref. LMP185\_21)  
442 and the project TED2021-130837B-I00 funded by MCIN/AEI/ /10.13039/501100011033 and by  
443 the “European Union NextGenerationEU/PRTR”.

444 **References**

445           Álvaro-Fuentes, J., Arrúe, J. L., Cantero-Martínez, C., Isla, R., Plaza-Bonilla, D., & Quílez,  
446 D. (2016). Fertilization Scenarios in Sprinkler-Irrigated Corn under Mediterranean Conditions:  
447 Effects on Greenhouse Gas Emissions. *Soil Sci. Soc. Am. J.*, 80(3), 662-671.  
448 <https://doi.org/10.2136/sssaj2015.04.0156>

449           Barton, L., Wolf, B., Rowlings, D., Scheer, C., Kiese, R., Grace, P., Stefanova, K.,  
450 Butterbach-Bahl, K. Sampling frequency affects estimates of annual nitrous oxide fluxes. *Sci*  
451 *Rep*2015, 5 (1), 15912. <https://doi.org/10.1038/srep15912>

452           Clough, T. J., Rochette, P., Thomas, S. M., Pihlatie, M., Christiansen, J. R., & Thorman,  
453 R. E. (2020). Global Research Alliance N<sub>2</sub>O chamber methodology guidelines: Design  
454 considerations. *J. Environ. Qual.*, 49(5), 1081-1091. <https://doi.org/10.1002/jeq2.20117>

455           Collier, S. M., Ruark, M. D., Oates, L. G., Jokela, W. E., & Dell, C. J. (2014). Measurement  
456 of greenhouse gas flux from agricultural soils using static chambers. *JoVE*, (90), e52110.  
457 <https://doi.org/10.3791/52110>

458           Davidson, E. A., & Janssens, I. A. (2006). Temperature sensitivity of soil carbon  
459 decomposition and feedbacks to climate change. *Nature*, 440(7081), 165-173.  
460 <https://doi.org/10.1038/nature04514>

461           de Klein, C. A. M., Harvey, M. J., Clough, T. J., Petersen, S. O., Chadwick, D. R., &  
462 Venterea, R. T. (2020). Global research alliance nitrous oxide chamber methodology guidelines:  
463 Introduction, with health and safety considerations. *J. Environ. Qual.*, 49(5), 1073-1080.  
464 <https://doi.org/10.1002/jeq2.20131>

465           Ding, W., Cai, Z., & Tsuruta, H. (2004). Diel variation in methane emissions from the  
466 stands of *Carex lasiocarpa* and *Deyeuxia angustifolia* in a cool temperate freshwater marsh. *Atmos.*  
467 *Environ.*, 38(2), 181-188. <https://doi.org/10.1016/j.atmosenv.2003.09.066>

468 Ferrara, R. M., Carozzi, M., Decuq, C., Loubet, B., Finco, A., Marzuoli, R., Gerosa, G., Di  
469 Tommasi, P., Magliulo, V. & Rana, G. (2021). Ammonia, nitrous oxide, carbon dioxide, and water  
470 vapor fluxes after green manuring of faba bean under Mediterranean climate. *Agric. Ecosyst.*  
471 *Environ.*, 315, 107439. <https://doi.org/10.1016/j.agee.2021.107439>

472 Forte, A., Fiorentino, N., Fagnano, M., & Fierro, A. (2017). Mitigation impact of minimum  
473 tillage on CO<sub>2</sub> and N<sub>2</sub>O emissions from a Mediterranean maize cropped soil under low-water input  
474 management. *Soil Tillage Res.*, 166, 167-178. <https://doi.org/10.1016/j.still.2016.09.014>

475 Francis Clar, J. T., & Anex, R. P. (2020). Flux intensity and diurnal variability of soil N<sub>2</sub>O  
476 emissions in a highly fertilized cropping system. *Soil Sci. Soc. Am. J.*, 84(6), 1983-1994.  
477 <https://doi.org/10.1002/saj2.20132>

478 Franco-Luesma, S., Álvaro-Fuentes, J., Plaza-Bonilla, D., Arrúe, J. L., Cantero-Martínez,  
479 C., & Caveró, J. (2019). Influence of irrigation time and frequency on greenhouse gas emissions  
480 in a solid-set sprinkler-irrigated maize under Mediterranean conditions. *Agric. Water Manage.*,  
481 221, 303-311. <https://doi.org/10.1016/j.agwat.2019.03.042>

482 Franco-Luesma, S., Caveró, J., Plaza-Bonilla, D., Cantero-Martínez, C., Tortosa, G.,  
483 Bedmar, E. J., & Álvaro-Fuentes, J. (2020). Irrigation and tillage effects on soil nitrous oxide  
484 emissions in maize monoculture. *Agron. J.*, 112(1), 56-71. <https://doi.org/10.1002/agj2.20057>

485 Franco-Luesma, S., Caveró, J., Plaza-Bonilla, D., Cantero-Martínez, C., Arrúe, J. L., &  
486 Álvaro-Fuentes, J. (2020). Tillage and irrigation system effects on soil carbon dioxide (CO<sub>2</sub>) and  
487 methane (CH<sub>4</sub>) emissions in a maize monoculture under Mediterranean conditions. *Soil Tillage*  
488 *Res.*, 196, 104488. <https://doi.org/10.1016/j.still.2019.104488>

489 Franco-Luesma, S., Lafuente, V., Alonso-Ayuso, M., Bielsa, A., Kouchami-Sardoo, I.,  
490 Arrúe, J. L., & Álvaro-Fuentes, J. (2022). Maize diversification and nitrogen fertilization effects

491 on soil nitrous oxide emissions in irrigated Mediterranean conditions. *Front. Environ. Sci.*, 10,  
492 914851. <https://doi.org/10.3389/fenvs.2022.914851>

493 Grace, P. R., van der Weerden, T. J., Rowlings, D. W., Scheer, C., Brunk, C., Kiese, R.,  
494 Butterbach-Bahl, K., Rees, R. M., Robertson, G. P. & Skiba, U.M. (2020). Global Research  
495 Alliance N<sub>2</sub>O chamber methodology guidelines: Considerations for automated flux measurement.  
496 *J. Environ. Qual.*, 49(5), 1126-1140. <https://doi.org/10.1002/jeq2.20124>

497 Harvey, M. J., Sperlich, P., Clough, T. J., Kelliher, F. M., McGeough, K. L., Martin, R. J.,  
498 & Moss, R. (2020). Global Research Alliance N<sub>2</sub>O chamber methodology guidelines:  
499 Recommendations for air sample collection, storage and analysis. *J. Environ. Qual.*, 49(5), 1110-  
500 1125. <https://doi.org/10.1002/jeq2.20129>

501 Hoffmann, M., Pehle, N., Huth, V., Jurisch, N., Sommer, M. and Augustin, J. (2018). A  
502 simple method to assess the impact of sealing, headspace mixing and pressure vent on airtightness  
503 of manually closed chambers. *J. Plant Nutr. Soil Sci.*, 181, 36-40.  
504 <https://doi.org/10.1002/jpln.201600299>

505 Intergovernmental Panel on Climate Change, IPCC (2014). *Climate Change 2014:  
506 Synthesis Report. Contribution of Working Groups I, II and III to the Fifth Assessment Report of  
507 the Intergovernmental Panel on Climate Change (IPCC).*

508 Isla, R., Castillo, M. G., Medina, E. T., Latorre, B., de Viteri, D. Q. S., & Caverro, J. (2022).  
509 Greenhouse gas emissions associated to sprinkler-irrigated alfalfa under semi-arid Mediterranean  
510 conditions. *Span. J. Agric. Res.*, 20(3), 4. <https://doi.org/10.5424/sjar/2022203-18416>

511 Lawrence, N. C., & Hall, S. J. (2020). Capturing temporal heterogeneity in soil nitrous  
512 oxide fluxes with a robust and low-cost automated chamber apparatus. *Atmos. Meas. Tech.*, 13(7),  
513 4065-4078. <https://doi.org/10.5194/amt-13-4065-2020>

514 Lloyd, J. and Taylor J, A. (1994). On the temperature dependence of soil respiration.  
515 *Functional Ecology*, 8, 315–323. <https://doi.org/10.2307/2389824>

516 Lognoul, M., Theodorakopoulos, N., Hiel, M. P., Regaert, D., Broux, F., Heinesch, B., ...  
517 & Aubinet, M. (2017). Impact of tillage on greenhouse gas emissions by an agricultural crop and  
518 dynamics of N<sub>2</sub>O fluxes: Insights from automated closed chamber measurements. *Soil Tillage*  
519 *Res.*, 167, 80-89. <https://doi.org/10.1016/j.still.2016.11.008>

520 Nickerson, N. (2016). Evaluating gas emission measurements using Minimum Detectable  
521 Flux (MDF). Eosense Inc., Dartmouth, Nova Scotia, Canada.

522 Oertel, C., Matschullat, J., Zurba, K., Zimmermann, F., & Erasmi, S. (2016). Greenhouse  
523 gas emissions from soils—A review. *Chem Erde-Geochem.*, 76(3), 327-352.  
524 <https://doi.org/10.1016/j.chemer.2016.04.002>

525 Parkin, T. B. (2008). Effect of sampling frequency on estimates of cumulative nitrous oxide  
526 emissions. *J. Environ. Qual.*, 37(4), 1390–1395. <https://doi.org/10.2134/jeq2007.0333>

527 Pihlatie, M. K., J. R. Christiansen, H. Aaltonen, J. F. J. Korhonen, A. Nordbo, T. Rasilo,  
528 G. Benanti, M. Giebels, M. Helmy, J. Sheehy, S. Jones, R. Juszczak, R. Klefoth, R. Lobo-do-Vale,  
529 A. P. Rosa, P. Schreiber, D. Serça, S. Vicca, B. Wolf, and J. Pumpanen. (2013). Comparison of  
530 static chambers to measure CH<sub>4</sub> emissions from soils. *Agric. For. Meteorol.*, 171, 124-136.  
531 <https://doi.org/10.1016/j.agrformet.2012.11.008>

532 Pumpanen, J., Ilvesniemi, H., Perämäki, M., & Hari, P. (2003). Seasonal patterns of soil  
533 CO<sub>2</sub> efflux and soil air CO<sub>2</sub> concentration in a Scots pine forest: comparison of two chamber  
534 techniques. *Glob. Change Biol.*, 9(3), 371-382. <https://doi.org/10.1046/j.1365-2486.2003.00588.x>

535 R Core Team (2022). R: A language and environment for statistical computing. R  
536 Foundation for Statistical Computing, Vienna, Austria. Version 4.2.2. <https://www.R-project.org/>

537           Reeves, S., Wang, W., Salter, B., & Halpin, N. (2016). Quantifying nitrous oxide emissions  
538 from sugarcane cropping systems: Optimum sampling time and frequency. *Atmos. Environ.*, 136,  
539 123-133. <https://doi.org/10.1016/j.atmosenv.2016.04.008>

540           Rochette, P., & Eriksen-Hamel, N. S. (2008). Chamber Measurements of Soil Nitrous  
541 Oxide Flux: Are Absolute Values Reliable? *Soil Sci. Soc. Am. J.*, 72(2), 331.  
542 [doi:10.2136/sssaj2007.0215](https://doi.org/10.2136/sssaj2007.0215)

543           Savage, K., Phillips, R., & Davidson, E. (2014). High temporal frequency measurements  
544 of greenhouse gas emissions from soils. *Biogeosciences*, 11(10), 2709-2720.  
545 <https://doi.org/10.5194/bg-11-2709-2014>

546           Smith, K. A., & Dobbie, K. E. (2001). The impact of sampling frequency and sampling  
547 times on chamber- based measurements of N<sub>2</sub> O emissions from fertilized soils. *Glob. Change*  
548 *Biol.*, 7(8), 933–945. <https://doi.org/10.1046/j.1354-1013.2001.00450.x>

549           Yu, L., Wang, H., Wang, G., Song, W., Huang, Y., Li, S. G., Liang, N., Tang, Y. & He, J.  
550 S. (2013). A comparison of methane emission measurements using eddy covariance and manual  
551 and automated chamber-based techniques in Tibetan Plateau alpine wetland. *Environ. Pollut.*, 181,  
552 81-90. <https://doi.org/10.1016/j.envpol.2013.06.018>

553           Wang, Z.-P., & Han, X.-G. (2005). Diurnal variation in methane emissions in relation to  
554 plants and environmental variables in the Inner Mongolia marshes. *Atmos. Environ.*, 39(34),  
555 6295–6305. <https://doi.org/10.1016/j.atmosenv.2005.07.01>

556           Wiebe, K., Robinson, S., & Cattaneo, A. (2019). Climate change, agriculture and food  
557 security: impacts and the potential for adaptation and mitigation. *Sustainable Food and*  
558 *Agriculture*, 55-74. <https://doi.org/10.1016/B978-0-12-812134-4.00004-2>

559 Wu, Y. F., Whitaker, J., Toet, S., Bradley, A., Davies, C. A., & McNamara, N. P. (2021).  
560 Diurnal variability in soil nitrous oxide emissions is a widespread phenomenon. *Glob. Change*  
561 *Biol.*, 27(20), 4950-4966. <https://doi.org/10.1111/gcb.15791>

562

563
