# Supplementary material for: Measurement of greenhouse gas fluxes in agricultural soils with a flexible, open-design automated system
Source: Copernicus journal article supplement (doi:10.5194/egusphere-2024-804), 2024-04-11
Supplement: Supplementary file [file egusphere-2024-804-RC2-supplement.pdf]

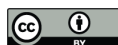

1 Measurement of greenhouse gas fluxes in agricultural soils with a flexible, open-design  
2 automated system

3 Franco-Luesma, Samuel<sup>1\*</sup>, Alonso-Ayuso, María<sup>1,2</sup>, Wolf, Benjamin<sup>3</sup>, Latorre, Borja<sup>1</sup>,  
4 Álvaro-Fuentes, Jorge<sup>1</sup>

5 <sup>1</sup> Soil and Water Department, Experimental Station of Aula Dei, Spanish National Research Council  
6 (CSIC), Zaragoza, Spain

7 <sup>2</sup> Agricultural Technological Institute of Castilla y León, Valladolid, Spain.

8 <sup>3</sup> Institute of Meteorology and Climate Research, Atmos. Environ.al Research (IMK-IFU), Karlsruhe  
9 Institute of Technology (KIT), Garmisch-Partenkirchen, Germany

10

11

12

13 \*Corresponding author: [sfrancoluesma@gmail.com](mailto:sfrancoluesma@gmail.com)

14

15

16

17 Keywords:

18 Greenhouse gas emissions; manual chamber system; automated chamber system

19

20

21

22

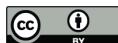

23 Abstract

24 Over the last decades and due to the current climate change situation, the study of the  
25 impacts of human activities on climate has reached great importance, being agriculture one  
26 of the main sources of soil greenhouse gas. There are different techniques to quantify the  
27 soil gas fluxes, such as micrometeorological techniques or chamber techniques, being the  
28 last one capable to assess different treatment at the same site. Manual chambers are the  
29 most common one. However, due to the low sampling frequency, this approach cannot  
30 resolve short-term emission events, like fertilization or rewetting. For this reason,  
31 automated chamber systems are an opportunity to improve soil gas flux determination, but  
32 their distribution is still scarce due to the cost and challenging technical implementation.  
33 The objective of this study was to develop an automated chamber system for agricultural  
34 systems under Mediterranean conditions and compare measured GHG flux rates to those  
35 derived using manual chambers. A comparison between manual and automated chamber  
36 systems was conducted to evaluate the soil gas fluxes obtained by the automated system.  
37 Moreover, over a period of one month the soil gas fluxes were determined by both systems  
38 to compare their capabilities to capture the temporal variability of soil gas emissions. The  
39 automated system reported higher soil GHG fluxes compared to the manual chamber  
40 system. Additionally, the higher sampling frequency of the automated chamber system  
41 allowed for the capture of daily flux variations, resulting in a more accurate estimation of  
42 cumulative soil gas emissions. The study emphasises the importance of chamber dimension  
43 and shape, as well as sampling frequency, in the development of chamber systems,  
44 especially when using the manual chamber system.



## 45 **1. Introduction**

46 Agriculture and land-use changes are significant contributors to climate change, accounting  
47 for a quarter of total global emissions of greenhouse gases (GHG) (IPCC, 2014). Moreover,  
48 agricultural emissions are expected to increase along with food demand (Wiebe et al., 2019).  
49 Microbial activity is ~~the main~~ responsible of the production and emission of the different soil GHG.  
50 Microbial processes are influenced by several abiotic factors such as soil water content, soil  
51 temperature or nutrient availability. The different farming practices – i.e. crop rotation,  
52 fertilization, irrigation – have a significant impact on these factors, and, therefore, they can have a  
53 great influence on soil GHG emissions (Oertel et al., 2016). By accurately measuring soil GHG  
54 emissions, it is possible to identify the major sources and understand the impact associated with  
55 various farming practices. This valuable information can be provided to policymakers and  
56 regulators to develop science-based policies and regulations that incentivize farmers to adopt more  
57 sustainable practices. Thus, measuring soil GHG emissions in agriculture is crucial to promote  
58 sustainable farming practices, that can mitigate climate change.

59 The use of manual chambers is one of the most widespread methods for studying soil GHG  
60 emissions ~~on a small spatial and temporal scale~~ (Collier et al., 2014). ~~These chambers~~ are designed  
61 to establish an enclosed environment, facilitating the periodic collection of gases emitted from or  
62 consumed in the soil ~~using syringes~~. Subsequently, the ~~gathered~~ gas samples are subjected to  
63 laboratory analysis through gas chromatography (Harvey et al., 2020). These analyses determine  
64 the concentration of GHG within the chamber headspace and allow the calculation of emission  
65 rates based on the change in gas concentration over a given time span. This method is characterized  
66 by its simplicity and versatility as ~~they~~ are relatively simple to use and can be employed across  
67 diverse ecosystems and soil types (de Klein et al., 2020). Manual chambers are relatively simple  
68 to construct and can be tailored to fit specific research requirements. Besides, compared to  
69 alternative methods, they entail relatively low cost. However, they have as well some limitations.



70 For instance, their measurement frequency is restricted due to the time-intensive nature of manual  
71 sampling and subsequent analysis, making high-frequency sampling impractical. Usually,  
72 sampling frequency is not higher than one sampling per day, but it's well established that sampling  
73 frequency affects annual GHG estimations (Barton et al., 2015). For this reason, efforts are often  
74 concentrated on intense sampling frequencies during short periods (hours to days) when significant  
75 emissions peaks are expected, but later, during the rest of the campaign, samplings are carried out  
76 every 1 to 4 weeks (or even sometimes not considered). Another aspect to consider involves the  
77 notable soil disruption caused when samples need to be collected, such as after an irrigation event.

78 In contrast to manual chambers, the utilization of automated chambers coupled with an in-  
79 situ gas analyzer allows sampling at a higher temporal frequency. Consequently, these automated  
80 systems more comprehensively capture temporal variations, enhancing insight into the dynamics  
81 of soil GHG emissions on a daily and seasonal basis (Grace et al., 2020). Automation also ensures  
82 capturing fluxes linked to unexpected events (such as rainstorms), obtaining data in areas of  
83 difficult access, and reducing the impact of soil disturbance on measurements. However, this  
84 method requires costly equipment and skilled operators, and implies different infrastructure  
85 constraints. Over recent decades, several groups have crafted automated systems (Lognoul et al.,  
86 2017, Lawrence and Hall, 2020).

87 To date, the number of experiences using automated chambers coupled with in situ gas  
88 analyzer under Mediterranean conditions is scarce (Forte et al., 2017, Ferrara et al., 2021, Isla et  
89 al., 2022) and, as far as we have been able to find out, **none of these previous studies used chamber**  
90 **systems consisting in a total of 12 individual chambers.** The objective of this paper is to present  
91 an innovative non-commercial soil GHG measurement system based on automated chambers  
92 linked to an in situ photoacoustic multigas analyzer and describe its operational details. ~~Besides, a~~  
93 comparison between this automated system and the manual static chamber methodology is  
94 **presented.**



95 **2. Materials and Methods**

96 **2.1. Automated system description**

97 In this section, we present an automated chamber system tailored for monitoring soil gas  
98 emissions. By integrating openness, cost-effectiveness, and versatility, this system facilitates  
99 precise and dynamic measurements of soil GHG fluxes. Our design principles focused on building  
100 an adaptable configuration and real-time functionality, alluding to its potential importance in  
101 agricultural and environmental research. The system consists of three main parts: the chambers,  
102 the set of solenoid valves controlled by a computer (central control unit) and the multigas analyzer  
103 (Figure 1).

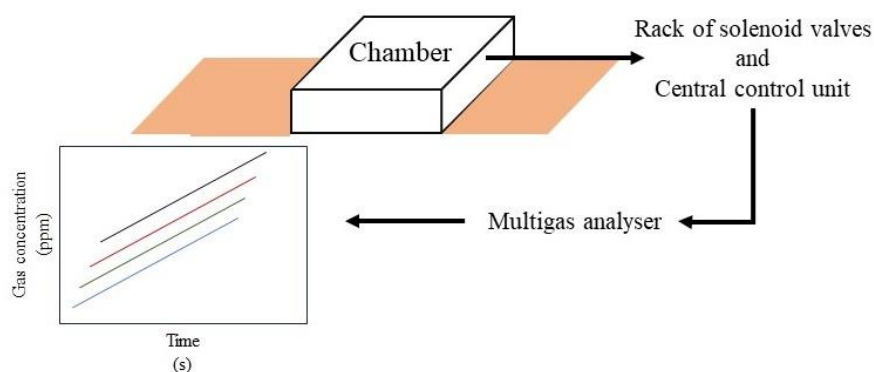

104 Figure 1. General scheme of the automated soil GHG measuring system.  
105  
106

107 **2.2. Soil chamber design**

108 Soil chambers, ‘Queensland’ design, have been built following a model provided by the  
109 Terrestrial Bio-Geo-Chemistry Division (Institute of Meteorology and Climate Research, Atmos.  
110 Environ.al Research (IMK-IFU), Karlsruhe Institute of Technology (KIT)). Chambers consisted  
111 of an aluminum structure of 0.50 x 0.50 m length and width and 0.15 m height closed with  
112 methacrylate panels and two lids 0.50 x 0.25 m width and length that are controlled by four  
113 pneumatic actuators, two per lid (Figure 2a). Besides, lids open at a 90° angle allowing rainfall or

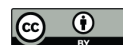

114 irrigation water supply to reach the soil surface of the area covered by the chambers. All  
115 methacrylate panels were coated with an aluminum bubble foil to keep the internal chamber  
116 temperature homogeneous during the enclosure time. Moreover, a rubber seal was fixed to the lids  
117 and the bottom part of each chamber to ensure a hermetic close and avoid gas leakage during the  
118 sampling process.

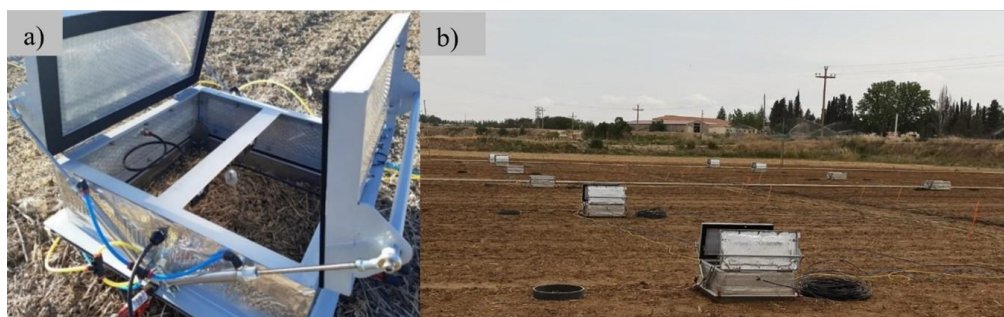

119 Figure. 2. (a) Open automated chamber deployed in the field trial ('Queensland' design). (b) Set  
120 of chambers deployed in the field trial. Dark rings next to chambers are the bases for manual  
121 chambers.  
122  
123

124 The gas sample line (polyethylene coated aluminum tube, Eaton Sinflex. 6/4mm external  
125 internal diameter, respectively) entered each chamber via one of the side panels, positioned  
126 approximately halfway up. In the central area of the chamber, the tube was bent facing downwards  
127 and the tip was protected by a small PVC funnel to prevent water condensation at the tube inlet. A  
128 vent (matching the material and diameter of the gas sampling line) was positioned on the opposite  
129 side panel to equalize pressure between the chamber's interior and exterior during flux  
130 measurements. Moreover, each chamber has two small fans (60x60x25 mm 12V) to promote air  
131 mixing inside the chamber.

132 Three chambers were equipped with a threaded cable gland on a lateral methacrylate panel  
133 for mounting a thermistor (107, Campbell Scientific Ltd., UK) to monitor internal chamber  
134 temperature. Chambers were attached by clamps to stainless steel bases (0.5 x 0,5 x 0.1) with sharp



135 edges at the bottom that were inserted 0.10 m into the soil . Plants (crop and weeds) growing inside  
136 the chambers were cut since the crop during this experiment was maize (*Zea mays* L.) (Figure 2b).

137

### 138 **2.3. Automated chamber operation**

139 The chambers opened and closed by means of pneumatic actuators. This setup comprised  
140 an air compressor delivering pressure to the pneumatic actuators. Inside a shed located next to the  
141 field trial, three solenoid valves installed in a panel, received air from the compressor (6 bar) and  
142 directed compressed air to the chambers. Routing of compressed air was facilitated by an external  
143 relay controller (8 relay board, 24V 6.5A, YWBL-WH) directly linked to the computer. In the  
144 configuration of this study, three sets of four chambers each opened and closed simultaneously.  
145 Similarly, each sampling line from each chamber was connected to a two-way solenoid valve that  
146 regulated the entry of the gas sample from each of the chambers to the photoacoustic multi-gas  
147 analyzer (Gasera One, Gasera Ltd, Finland). The two-way solenoid valves were connected to a  
148 relay board (16 relay board, 24V 6.5A, YWBL-WH) that controlled which valve was activated  
149 (Figure 3).

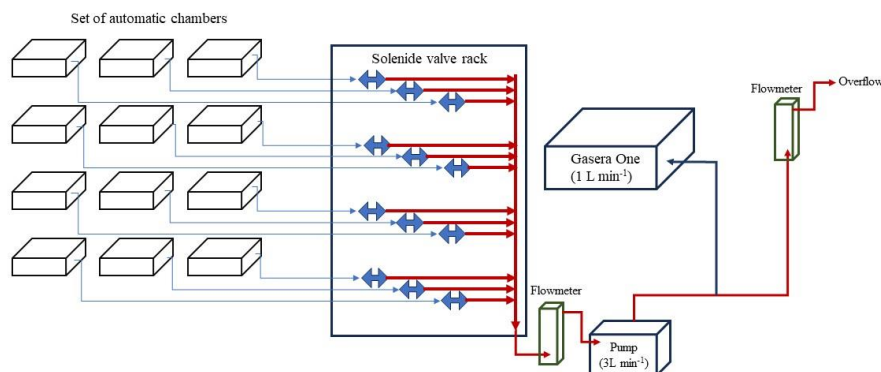

150

151 Figure. 3. Description of the automated chamber system.

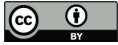

152 To bring the gas from the chamber to the gas analyzer, an external diaphragm pump (KNF  
153 NMP830KNDC 12V, KNF Neuberger, Inc, Freiburg im Breisgau, Germany) was coupled to the  
154 two-way solenoid valve bank. This pump continuously drew air from the activated sampling line,  
155 maintaining a flow rate of  $3\text{ L min}^{-1}$ . The gas analyzer (Analysis cell volume 30 mL) drew sample  
156 gas from this primary line at a rate of  $1\text{ L min}^{-1}$  for a duration of six seconds every one and a half  
157 minutes (Figure 3c). Two flowmeters were attached to the main line. The initial one, positioned  
158 after the pump and preceding the gas analyzer, regulated the gas flow delivered to the analyzer.  
159 The second flowmeter ensured a continuous overflow greater than  $1\text{ L min}^{-1}$ , guaranteeing  
160 sufficient gas flow from the active sampling line to the gas analyzer (Figure 3). The solenoid valve  
161 banks, pneumatic system, chamber sampling lines, and gas analyzer were all managed through a  
162 custom script created using R statistical software version 4.2.2 (R Core Team, 2022).

163 The current setup consists of 3 blocks of four chambers each block. This configuration responds  
164 to the needs of the current experimental design, however, since it is an open system, the  
165 configuration is variable and can be individualised for each of the chambers.

166

#### 167 ***2.4. Evaluation of the automated measurement system***

168 Over the last decade, the current research team members have successfully conducted  
169 several GHG flux studies using a manual closed chamber system (Álvaro-Fuentes et al., 2016,  
170 Franco-Luesma et al., 2019,2020a, 2020b, 2022). Based on that, an evaluation experiment was  
171 carried out to compare the soil gas fluxes obtained via the newly developed automated chamber  
172 system against the conventional manual chamber system used regularly by the research group.  
173 This evaluation experiment was aimed to evaluate the impact of i) the chamber design and ii) the  
174 sampling frequency and time on the differences in soil GHG fluxes between a manual and an  
175 automated chamber measurement system.



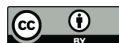

176 Manual chambers consisted of a Polyvinyl Chloride (PVC) cylinder of 0.315 m diameter  
177 and 0.2 m height coated by white thermal paint to avoid internal air temperature increasing during  
178 the deployed time. A rubber septum was affixed atop the chamber to enable gas sampling via a  
179 plastic syringe equipped with a needle. Gas samples from each chamber were transferred to a 12  
180 mL pre-evacuated glass vial (Exetainer Labco®). The concentrations of CO<sub>2</sub>, CH<sub>4</sub> and N<sub>2</sub>O in the  
181 gas samples were determined by gas chromatography Agilent 7890B (Agilent, Santa Clara, CA,  
182 United States) equipped with an autosampler (PAL3 autosampler, Zwingen, Switzerland). Soil gas  
183 fluxes were determined based on the increase of the gas concentration during the deployment  
184 period. Further details of the gas chromatography method and manual chamber design ~~could~~  
185 found in Franco-Luesma et al. (2022).

186 The evaluation experiment took place in a maize (*Zea mays* L.) field trial sown on  
187 10/05/2023 under irrigation conditions. The soil is a *Typic Xerofluvent* (Soil Survey Staff, 2015)  
188 with a silty loam texture, characterized by a basic pH of 8, a calcium carbonate content (CaCO<sub>3</sub>)  
189 of 48%, a total organic carbon content of 0.6% and a bulk density of 1.33 g cm<sup>-3</sup> in the first 0.25  
190 m soil depth. The area is characterized by a Mediterranean semiarid climate with a mean annual  
191 air temperature of 14.1 °C, mean annual precipitation of 298 mm and mean annual reference  
192 evapotranspiration (ET<sub>o</sub>) of 1,243 mm.

193 The evaluation experiment had two different steps. The first step consisted of simultaneous  
194 gas sampling with both manual and automated chamber systems on four different dates (i.e.  
195 19/06/2023, 20/06/2023, 21/06/2023 and 28/06/2023). On June 19<sup>th</sup> and 20<sup>th</sup>, chambers were  
196 sampled once during 06:00 to 07:30 GMT. On June 21<sup>st</sup> and June 28<sup>th</sup>, chambers were sampled  
197 four times between 06:00 to 12:00 GMT. Consequently, a total of ten samplings were performed,  
198 covering four different days and different hours of the day to capture the possible ~~diurnal~~  
199 of soil gas emission.

200



201 In this short time experiment, two chambers of each block were selected to compared with  
202 the manual chambers. The sampling sequence for the automated system was programmed to  
203 sample each chamber every five minutes, with a total enclosure time of 28 minutes. However, due  
204 to the sequence configuration, the computable time for determining the soil gas fluxes was 20  
205 minutes as described in the sequence diagram (Figure S1). The two manual chambers of each block  
206 were closed at the same time as the automated chamber and gas sampling was done at time 0 (first  
207 automated chamber sampling), at time 10 minutes and at time 20 minutes (coinciding with the last  
208 automated chamber sampling).

209 Finally, in order to complement the results obtained in the first step of the evaluation  
210 experiment, a second step ~~consists of compared~~ the soil gas fluxes obtained by each ~~chamber~~  
211 ~~system~~ for one month were carried out. For that propose, from 22 of May 2023 to 29 of June 2023,  
212 soil CO<sub>2</sub>, CH<sub>4</sub> and N<sub>2</sub>O fluxes were measured by the manual and automated chamber systems, to  
213 assess the impact of the sampling time (i.e. hour of the day) and sampling frequency on the  
214 estimation of the soil gas fluxes.

215 During this period, the sampling frequency and configuration of the automated chamber  
216 system was the same as it was used during the step one of the evaluation experiment. The twelve  
217 chambers were grouped in three set of four chambers each, being sampling every five minutes for  
218 28 minutes, resulting in a total of 5 sampling points per chamber (Figure S1). However, the  
219 procedure followed in the manual chamber system was different and it consisted of the collection  
220 of three gas samples at time 0, 20 and 40 minutes after closing the chamber. The sampling  
221 frequency followed a daily frequency over the first five days and, afterwards, weekly  
222 measurements till the end of the experiment. For both chamber systems, the measuring ~~instrument~~  
223 (i.e. photoacoustic multi-gas analyzer and gas chromatography for automated and manual chamber  
224 systems, respectively) were calibrated by using 4 different ultra-high purity gas standards  
225 (Carbueros Metálicos, Barcelona, Spain, standard 1, 400 ppm CO<sub>2</sub>, 1.5 ppm CH<sub>4</sub>, 0.3 ppmN<sub>2</sub>O,



226 standard 2, 800 ppm CO<sub>2</sub>, 2 ppm CH<sub>4</sub>, 1 ppmN<sub>2</sub>O, standard 3, 1500 ppm CO<sub>2</sub>, 4 ppm CH<sub>4</sub>, 3  
227 ppmN<sub>2</sub>O, standard 4, 3000 ppm CO<sub>2</sub>, 6 ppm CH<sub>4</sub>, 6 ppmN<sub>2</sub>O) in order to standardize the  
228 concentration values obtained.

229

### 230 **2.5. Data analysis**

231 Soil gas flux (mg of gas m<sup>2</sup> day<sup>-1</sup>) of CO<sub>2</sub>, CH<sub>4</sub> and N<sub>2</sub>O, i.e.,  $f_{CO_2}$ ,  $f_{CH_4}$  and  $f_{N_2O}$  was  
232 calculated using the following equation (Eq. 1)

$$233 \quad f_{gas} = \frac{Fit * MW * p * h}{R * T} * fT * fU \quad (Eq. 1)$$

234 where *Fit* represents the increase of gas concentration in the chamber over the enclosure  
235 time, *MW* is the molar weight of the atom in the gas molecule (i.e. 12 g mol<sup>-1</sup> for CO<sub>2</sub> and CH<sub>4</sub>  
236 and 28 g mol<sup>-1</sup> for N<sub>2</sub>O), *p* is the atmospheric pressure in Pa, *h* is the chamber height in m, *R* is the  
237 ideal gas constant in J K<sup>-1</sup> mol<sup>-1</sup>, *T* is the chamber air temperature in K, *fT* is the correction factor  
238 of time units, 1440 minutes day<sup>-1</sup> and *fU* is the unit correction factor, 10<sup>3</sup>. Cumulative soil CO<sub>2</sub>,  
239 CH<sub>4</sub> and N<sub>2</sub>O emissions were calculated using the trapezoid rule (Levy et al., 2017). Comparison  
240 between systems was done by linear fitting considering only soil gas fluxes that presented a R<sup>2</sup>  
241 higher than 0.8. All analyses were done using the R **statistical software**.

242

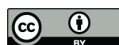

243 **3. Results and Discussion**

244 **3.1. Automated system comparison**

245 The comparison between the automated and manual measurement systems showed a linear  
246 response for the three gases compared. In the case of soil CO<sub>2</sub>, the automated system presented an  
247 average flux 58% greater compared to the manual system with a minimal flux difference of 425  
248 mg CO<sub>2</sub>-C m<sup>2</sup> day<sup>1</sup> (Figure 4a). Data exhibited moderate dispersion ( $R^2=0.60$ ) revealing increased  
249 accuracy when manual fluxes were ~~greater than~~ 500 mg CO<sub>2</sub>-C m<sup>2</sup> day<sup>1</sup> (Figure 4a). Regarding  
250 CH<sub>4</sub> fluxes, the automated chamber system showed values greater than the fluxes obtained in the  
251 manual chamber system, showing a better fitting when fluxes were positive (Figure 4b). However,  
252 the lowest data dispersion between both measurement systems was obtained for soil N<sub>2</sub>O fluxes  
253 ( $R^2 > 0.87$ ) but as observed for the other two gases, the automated chamber system reported fluxes  
254 values 40% greater than the manual chamber system (Figure 4c).

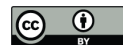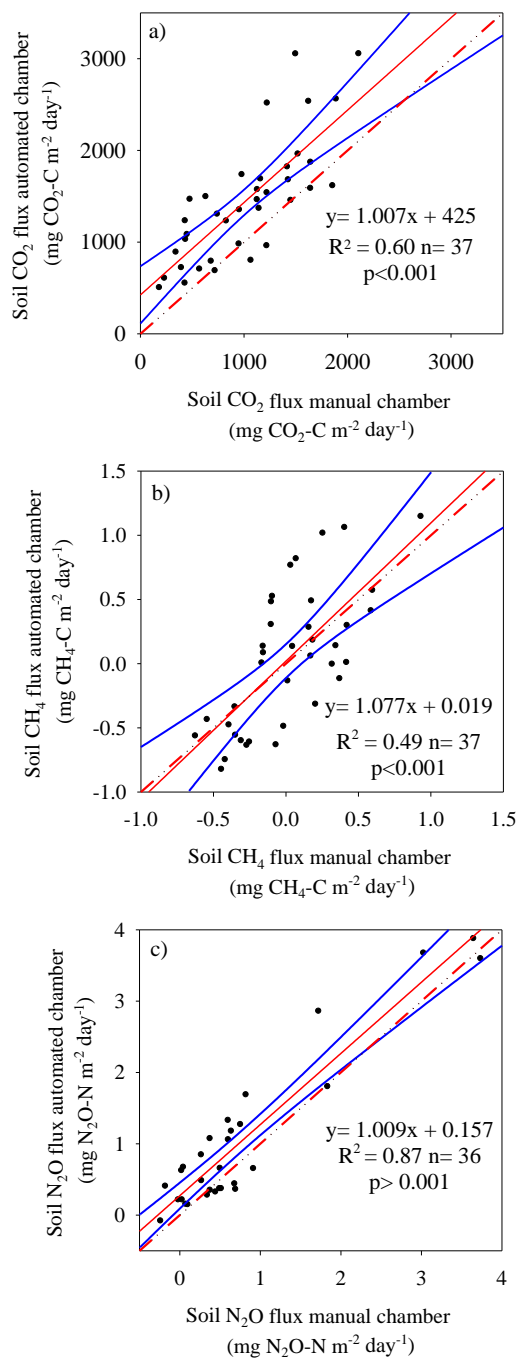

255  
256 Figure 4. Comparison of soil gas flux between automated and manual chamber systems for carbon  
257 dioxide (CO<sub>2</sub>) fluxes (a), methane (CH<sub>4</sub>) fluxes (b) and nitrous oxide (N<sub>2</sub>O) fluxes (c). Blue solid  
258 lines represent 95% confidence intervals. Red dotted lines represent 1:1 line.  
259



260           These differences between both measurement systems in flux magnitude and for the three  
261 studied gases may probably be a consequence of the different chamber shapes and dimensions ~~that~~  
262 ~~presented both systems~~. Hoffmann et al. (2018) found that the shape and dimension of the chamber  
263 have a significant effect on CO<sub>2</sub> fluxes, observing that small and cylindrical chambers tend to  
264 result in higher underestimation of CO<sub>2</sub> fluxes compared with large and squared chambers. In line  
265 with the previous authors, Pihlatie et al. (2013) also found a significant effect of the chamber shape  
266 and dimension on soil CH<sub>4</sub> flux determination. Similarly, Rochette and Eriksen-Hamel (2008) also  
267 concluded that chamber shape and dimensions are critical factors in the estimation of GHG fluxes.

268           All previous studies agreed that the area/perimeter ratio is a key factor in soil gas flux  
269 estimation and, hence, they recommended a ratio greater than 0.10 m (Clough et al., 2020). In our  
270 work, the two types of chambers compared presented different area/perimeter ratios with values  
271 of 0.125 and 0.089 m for the automated and the manual chamber systems, respectively. This  
272 difference in the area/perimeter ratio could explain the greater CO<sub>2</sub>, CH<sub>4</sub> and N<sub>2</sub>O fluxes measured  
273 by the automated chamber system compared with the manual system. Moreover, the use of fans to  
274 mix the internal air of the automated chambers might have also explained the higher fluxes  
275 measured in this system compared with the manual system. Air-mixing by fans is ~~highly~~  
276 recommended to homogenize the internal air of the chamber, ensuring that the air sample aliquot  
277 is representative of the chamber headspace air (Clough et al., 2020).

278

### 279           ***3.2. Sampling time and frequency comparison***

280           The effect of sampling time and frequency on cumulative soil gas emissions was compared  
281 between the automated and the manual measuring systems. This analysis was performed during  
282 one month in which the automated chamber system ran continuously over the entire month, while  
283 in the manual chamber system sampling was only performed on nine different dates.



284 As expected, the automated chamber system was able to capture daily flux fluctuations, a  
 285 fact that was not possible for the manual chamber system, because only one gas sampling was  
 286 done for each of the selected dates (Figure 5). However, when fluxes temporal dynamics for each  
 287 gas were evaluated, it had been observed differences for each gas.

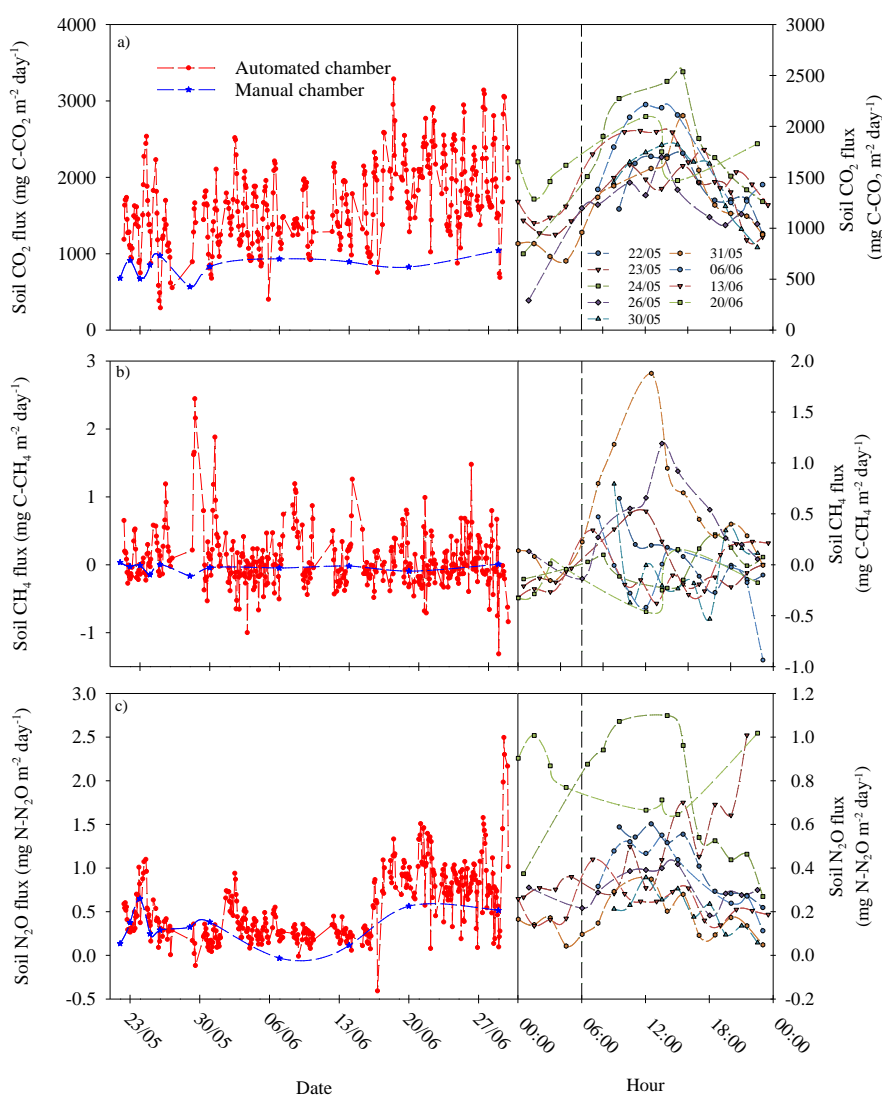

288 Figure 5. Comparison of soil gas flux and cumulative soil gas emissions between the automated  
 289 (blue line and bar) and the manual (red line and bar) chamber system for carbon dioxide (CO<sub>2</sub>)  
 290 fluxes (a), methane (CH<sub>4</sub>) fluxes (b) and nitrous oxide (N<sub>2</sub>O) fluxes (c) (left panel), and daily soil  
 291 flux of the automated chamber systems on nine different dates. Vertical dotted line indicates  
 292 manual sampling hour (i.e., 6 am) (right panel).  
 293



294 Soil CO<sub>2</sub> and CH<sub>4</sub> fluxes determined by the manual chamber system showed similar  
295 behaviour, presenting a low variation in the fluxes magnitude over the evaluated period, being  
296 more pronounced for soil CH<sub>4</sub> fluxes (Figure 5a, 5b). For example, this was clearly observed in  
297 the CH<sub>4</sub> in which the automated system captured flux peaks **greater than** 2 mg CH<sub>4</sub>-C m<sup>-2</sup> day<sup>-1</sup>  
298 while the manual fluxes ~~kept~~ close to 0 mg CH<sub>4</sub>-C m<sup>-2</sup> day<sup>-1</sup> over the entire measuring period  
299 (Figure 5b). Interestingly, the manual system was able to capture the temporal emission trend  
300 shown by the automated system for soil N<sub>2</sub>O fluxes, the gas that showed the greatest temporal  
301 variability over the period studied (Figure 5c).

302 Moreover, when the daily emission pattern of the automated chamber was evaluated for  
303 the manual sampling dates, it was observed that soil CO<sub>2</sub> fluxes presented the maximum fluxes  
304 rate between 12:00 and 16:00 GMT, a daily pattern similar to the results reported by Pumpanen et  
305 al. (2003) and Yu et al. (2013). The maximum soil CO<sub>2</sub> fluxes of one day were a factor of three  
306 higher than the minimum fluxes measured (Figure 5a). Differences between the maximum and the  
307 minimum CH<sub>4</sub> fluxes were lower since soil CH<sub>4</sub> fluxes only ranged between -0.5 to 0.5 mg CH<sub>4</sub>-  
308 C m<sup>-2</sup> day<sup>-1</sup> for most of the nine selected dates, expected for May 26<sup>th</sup> and 31<sup>st</sup> when soil CH<sub>4</sub>  
309 fluxes above 1 mg CH<sub>4</sub>-C m<sup>-2</sup> day<sup>-1</sup> were observed at midday (Figure 5b).

310 Soil N<sub>2</sub>O fluxes also presented a daily emission pattern characterized by reaching the  
311 maximum soil N<sub>2</sub>O from 08:00 to 16:00 GMT and the minimum during nighttime, but not being  
312 as clear as emission pattern observed for soil CO<sub>2</sub> fluxes (Figure 5c). This daily emission pattern  
313 was also observed by Wu et al. (2021) in a metanalysis which evaluated global daily N<sub>2</sub>O emission  
314 patterns. A possible explanation to the daily pattern observed in all three gases would be the  
315 temperature dependence of the biological process that governs the production and emission of soil  
316 GHG (Lloyd and Taylor, 1994, Smith and Dobbie, 2001, Davidson and Janssens, 2006.). This  
317 dependence would explain the higher emissions observed during daytime compared to nighttime  
318 (Fig. 5c).





319 The cumulative soil gas emissions of the three gases tended to be greater for the automated  
 320 than the manual measuring system (Fig. 6). For example, cumulative soil CO<sub>2</sub> emissions presented  
 321 significant differences between both sampling systems. The automated chamber system showed  
 322 average values 16% more than the manual chamber system (Fig 6a). Indeed, this difference was  
 323 even greater in CH<sub>4</sub> (more than 3-fold greater cumulative emissions in the automated than in the  
 324 manual measuring system, Fig. 6b). Cumulative CH<sub>4</sub> emissions showed positive values for the  
 325 automated chamber system while the average value for the manual chamber system was negative.  
 326 However, the variability observed for the manual chamber system was 10 times greater rather than  
 327 for the automated chamber system, a fact that resulted in the absence of significant differences  
 328 between both sampling systems. Cumulative soil N<sub>2</sub>O emissions did not show significant  
 329 differences between sampling systems despite that the average cumulative N<sub>2</sub>O emissions were  
 330 20% greater for the automated chamber system (Fig. 6c). As occurred with cumulative CH<sub>4</sub>  
 331 emissions, the manual chamber system showed a greater variability than the automatic chamber  
 332 system, reason that could explain the absence of significant differences between sampling systems.

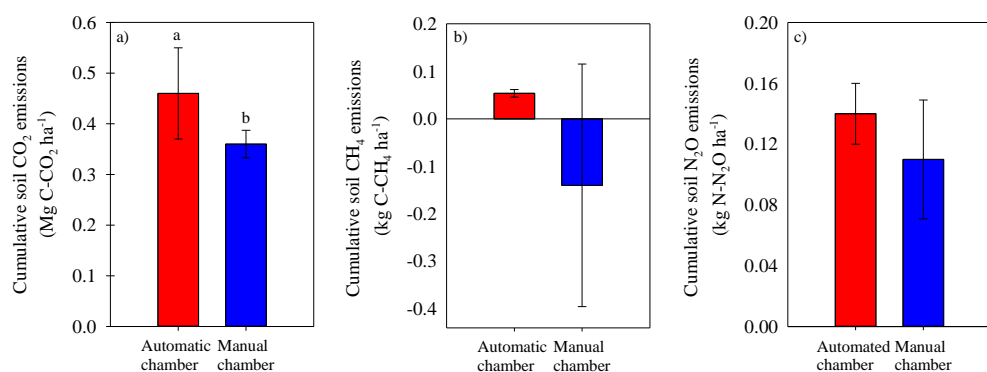

333  
 334 Figure 6. Comparison of soil cumulative soil gas emissions between the automated (blue bar) and  
 335 the manual (red bar) chamber system for carbon dioxide (CO<sub>2</sub>) (a), methane (CH<sub>4</sub>) (b) and nitrous  
 336 oxide (N<sub>2</sub>O) (c). Error bars represent standard error. Different letters indicate significant  
 337 differences at  $p < 0.05$ .  
 338



339 Differences in the different cumulative emissions found between measuring systems might  
340 have been explained by the next three points: (i) construction differences, (ii) the sampling time in  
341 the manual system, and (iii) the height/enclosure time ratio (Clough et al., 2020). The automated  
342 chamber presented higher area/perimeter ratios and air-mixing by fans which could contribute to  
343 the greater fluxes found in this system compared with the manual system. Regarding the sampling  
344 time, this was especially critical for CO<sub>2</sub> and CH<sub>4</sub>. For both gases, manual sampling was performed  
345 at 06:00 GMT, resulting in an underestimation of the average daily emission (Pumpanen et al.,  
346 2003, Yu et al., 2013). In contrast, for N<sub>2</sub>O, underestimation was lower since 06:00 GMT is  
347 considered a sampling time close to the optimal time for this gas (Wu et al., 2021). Finally,  
348 height/enclosure time ratio is also an important factor that affect the sensibility of the flux  
349 determination. As a recommendation, height/enclosure time ratio greater than 0.40 m hour<sup>-1</sup> is  
350 suggested to increase the minimum detectable flux and to reduce the impacts on air humidity,  
351 temperature and the gas diffusion process, variables that govern the soil gas fluxes between soil  
352 and atmosphere (Clough et al., 2020). In our study, the automated system resulted in  
353 height/enclosure ratios of 0.60 m hour<sup>-1</sup>, while in the manual system the ratios dropped to 0.30 m  
354 hour<sup>-1</sup>, explaining the lower cumulative emissions reported by the manual system.

355



356 **4. Conclusion**

357           The presented system features an open design, cost-effective components, and adaptable  
358 configuration, offering benefits in flexibility, compatibility, and affordability, which in the end  
359 resulted in a more precise monitoring of the time flux variability. Moreover, it has been highlighted  
360 that the shape, dimension, and configuration of the chamber system are critical factors that must  
361 be considered in the design of the chambers, being critical in setting area/perimeter and  
362 height/enclosure time ratios greater than 0.10m and 0.40m h<sup>-1</sup>, respectively. Likewise, in case there  
363 is not option to implement an automated system, the sampling time of the manual measuring  
364 system is critical resulting in significant over or underestimation. Our results showed that  
365 06:00GMT was an optimal sampling time for soil N<sub>2</sub>O emissions but resulted in an  
366 underestimation of soil CO<sub>2</sub> and CH<sub>4</sub> emissions. Therefore, based on the results presented in this  
367 work, automated chamber systems are a powerful tool for quantifying GHG fluxes from the soil,  
368 allowing to capture the large temporal variability that characterizes them. Moreover, open  
369 configuration systems, such as the one presented in this study, are more suitable for use in  
370 agricultural systems, allowing the number of chambers to be easily modified to cover as much  
371 variability as possible.

372



373 **Data availability**

374 All raw data can be provided by the corresponding authors upon request.

375

376 **Author contributions**

377 SF-L: Conceptualization, formal analysis, software, data acquisition, writing—original draft, data  
378 curation, methodology, formal analysis, investigation. MA-A: Conceptualization, methodology,  
379 writing—review; editing. BW: Writing—review. BL: Conceptualization ,methodology, software,  
380 writing—review, funding acquisition. JA-F: Conceptualization ,methodology, writing—review;  
381 editing, supervision, project administration, resources, funding acquisition

382

383 **Competing interests**

384 The authors declare that they have no conflict of interest.

385

386 **Acknowledgements**

387 We are grateful to Valero Pérez Laguardia for assistance in the in the development,  
388 construction and maintenance of the manual and automated chamber systems.

389 **Financial support**

390 This work was supported by the project AgriGEI funded by the Regional Government of  
391 Aragon (“Proyectos de I+D+i en líneas prioritarias del Gobierno de Aragón”, Ref. LMP185\_21)  
392 and the project TED2021-130837B-I00 funded by MCIN/AEI/ /10.13039/501100011033 and by  
393 the “European Union NextGenerationEU/PRTR”.



394 **References**

- 395           Álvaro-Fuentes, J., Arrúe, J. L., Cantero-Martínez, C., Isla, R., Plaza-Bonilla, D., & Quílez,  
396 D. (2016). Fertilization Scenarios in Sprinkler-Irrigated Corn under Mediterranean Conditions:  
397 Effects on Greenhouse Gas Emissions. *Soil Sci. Soc. Am. J.*, 80(3), 662-671.  
398 <https://doi.org/10.2136/sssaj2015.04.0156>
- 399           Barton, L., Wolf, B., Rowlings, D., Scheer, C., Kiese, R., Grace, P., Stefanova, K.,  
400 Butterbach-Bahl, K. Sampling frequency affects estimates of annual nitrous oxide fluxes. *Sci*  
401 *Rep*2015, 5 (1), 15912. <https://doi.org/10.1038/srep15912>
- 402           Clough, T. J., Rochette, P., Thomas, S. M., Pihlatie, M., Christiansen, J. R., & Thorman,  
403 R. E. (2020). Global Research Alliance N<sub>2</sub>O chamber methodology guidelines: Design  
404 considerations. *J. Environ. Qual.*, 49(5), 1081-1091. <https://doi.org/10.1002/jeq2.20117>
- 405           Collier, S. M., Ruark, M. D., Oates, L. G., Jokela, W. E., & Dell, C. J. (2014). Measurement  
406 of greenhouse gas flux from agricultural soils using static chambers. *JoVE*, (90), e52110.  
407 <https://doi.org/10.3791/52110>
- 408           Davidson, E. A., & Janssens, I. A. (2006). Temperature sensitivity of soil carbon  
409 decomposition and feedbacks to climate change. *Nature*, 440(7081), 165-173.  
410 <https://doi.org/10.1038/nature04514>
- 411           de Klein, C. A. M., Harvey, M. J., Clough, T. J., Petersen, S. O., Chadwick, D. R., &  
412 Venterea, R. T. (2020). Global research alliance nitrous oxide chamber methodology guidelines:  
413 Introduction, with health and safety considerations. *J. Environ. Qual.*, 49(5), 1073-1080.  
414 <https://doi.org/10.1002/jeq2.20131>
- 415           Ding, W., Cai, Z., & Tsuruta, H. (2004). Diel variation in methane emissions from the  
416 stands of *Carex lasiocarpa* and *Deyeuxia angustifolia* in a cool temperate freshwater marsh. *Atmos.*  
417 *Environ.*, 38(2), 181-188. <https://doi.org/10.1016/j.atmosenv.2003.09.066>



- 418 Ferrara, R. M., Carozzi, M., Decuq, C., Loubet, B., Finco, A., Marzuoli, R., Gerosa, G., Di  
419 Tommasi, P., Magliulo, V. & Rana, G. (2021). Ammonia, nitrous oxide, carbon dioxide, and water  
420 vapor fluxes after green manuring of faba bean under Mediterranean climate. *Agric. Ecosyst.*  
421 *Environ.*, 315, 107439. <https://doi.org/10.1016/j.agee.2021.107439>
- 422 Forte, A., Fiorentino, N., Fagnano, M., & Fierro, A. (2017). Mitigation impact of minimum  
423 tillage on CO<sub>2</sub> and N<sub>2</sub>O emissions from a Mediterranean maize cropped soil under low-water input  
424 management. *Soil Tillage Res.*, 166, 167-178. <https://doi.org/10.1016/j.still.2016.09.014>
- 425 Francis Clar, J. T., & Anex, R. P. (2020). Flux intensity and diurnal variability of soil N<sub>2</sub>O  
426 emissions in a highly fertilized cropping system. *Soil Sci. Soc. Am. J.*, 84(6), 1983-1994.  
427 <https://doi.org/10.1002/saj2.20132>
- 428 Franco-Luesma, S., Álvaro-Fuentes, J., Plaza-Bonilla, D., Arrúe, J. L., Cantero-Martínez,  
429 C., & Caveró, J. (2019). Influence of irrigation time and frequency on greenhouse gas emissions  
430 in a solid-set sprinkler-irrigated maize under Mediterranean conditions. *Agric. Water Manage.*,  
431 221, 303-311. <https://doi.org/10.1016/j.agwat.2019.03.042>
- 432 Franco-Luesma, S., Caveró, J., Plaza-Bonilla, D., Cantero-Martínez, C., Tortosa, G.,  
433 Bedmar, E. J., & Álvaro-Fuentes, J. (2020). Irrigation and tillage effects on soil nitrous oxide  
434 emissions in maize monoculture. *Agron. J.*, 112(1), 56-71. <https://doi.org/10.1002/agj2.20057>
- 435 Franco-Luesma, S., Caveró, J., Plaza-Bonilla, D., Cantero-Martínez, C., Arrúe, J. L., &  
436 Álvaro-Fuentes, J. (2020). Tillage and irrigation system effects on soil carbon dioxide (CO<sub>2</sub>) and  
437 methane (CH<sub>4</sub>) emissions in a maize monoculture under Mediterranean conditions. *Soil Tillage*  
438 *Res.*, 196, 104488. <https://doi.org/10.1016/j.still.2019.104488>
- 439 Franco-Luesma, S., Lafuente, V., Alonso-Ayuso, M., Bielsa, A., Kouchami-Sardoo, I.,  
440 Arrúe, J. L., & Álvaro-Fuentes, J. (2022). Maize diversification and nitrogen fertilization effects



441 on soil nitrous oxide emissions in irrigated Mediterranean conditions. *Front. Environ. Sci.*, 10,  
442 914851. <https://doi.org/10.3389/fenvs.2022.914851>

443 Grace, P. R., van der Weerden, T. J., Rowlings, D. W., Scheer, C., Brunk, C., Kiese, R.,  
444 Butterbach-Bahl, K., Rees, R. M., Robertson, G. P. & Skiba, U.M. (2020). Global Research  
445 Alliance N<sub>2</sub>O chamber methodology guidelines: Considerations for automated flux measurement.  
446 *J. Environ. Qual.*, 49(5), 1126-1140. <https://doi.org/10.1002/jeq2.20124>

447 Harvey, M. J., Sperlich, P., Clough, T. J., Kelliher, F. M., McGeough, K. L., Martin, R. J.,  
448 & Moss, R. (2020). Global Research Alliance N<sub>2</sub>O chamber methodology guidelines:  
449 Recommendations for air sample collection, storage and analysis. *J. Environ. Qual.*, 49(5), 1110-  
450 1125. <https://doi.org/10.1002/jeq2.20129>

451 Hoffmann, M., Pehle, N., Huth, V., Jurisch, N., Sommer, M. and Augustin, J. (2018). A  
452 simple method to assess the impact of sealing, headspace mixing and pressure vent on airtightness  
453 of manually closed chambers. *J. Plant Nutr. Soil Sci.*, 181, 36-40.  
454 <https://doi.org/10.1002/jpln.201600299>

455 Intergovernmental Panel on Climate Change, IPCC (2014). *Climate Change 2014:  
456 Synthesis Report. Contribution of Working Groups I, II and III to the Fifth Assessment Report of  
457 the Intergovernmental Panel on Climate Change (IPCC).*

458 Isla, R., Castillo, M. G., Medina, E. T., Latorre, B., de Viteri, D. Q. S., & Caverro, J. (2022).  
459 Greenhouse gas emissions associated to sprinkler-irrigated alfalfa under semi-arid Mediterranean  
460 conditions. *Span. J. Agric. Res.*, 20(3), 4. <https://doi.org/10.5424/sjar/2022203-18416>

461 Lawrence, N. C., & Hall, S. J. (2020). Capturing temporal heterogeneity in soil nitrous  
462 oxide fluxes with a robust and low-cost automated chamber apparatus. *Atmos. Meas. Tech.*, 13(7),  
463 4065-4078. <https://doi.org/10.5194/amt-13-4065-2020>



- 464 Lloyd, J. and Taylor J, A. (1994). On the temperature dependence of soil respiration.  
465 *Functional Ecology*, 8, 315–323. <https://doi.org/10.2307/2389824>
- 466 Lognoul, M., Theodorakopoulos, N., Hiel, M. P., Regaert, D., Broux, F., Heinesch, B., ...  
467 & Aubinet, M. (2017). Impact of tillage on greenhouse gas emissions by an agricultural crop and  
468 dynamics of N<sub>2</sub>O fluxes: Insights from automated closed chamber measurements. *Soil Tillage*  
469 *Res.*, 167, 80-89. <https://doi.org/10.1016/j.still.2016.11.008>
- 470 Oertel, C., Matschullat, J., Zurba, K., Zimmermann, F., & Erasmi, S. (2016). Greenhouse  
471 gas emissions from soils—A review. *Chem Erde-Geochem.*, 76(3), 327-352.  
472 <https://doi.org/10.1016/j.chemer.2016.04.002>
- 473 Parkin, T. B. (2008). Effect of sampling frequency on estimates of cumulative nitrous oxide  
474 emissions. *J. Environ. Qual.*, 37(4), 1390–1395. <https://doi.org/10.2134/jeq2007.0333>
- 475 Pihlatie, M. K., J. R. Christiansen, H. Aaltonen, J. F. J. Korhonen, A. Nordbo, T. Rasilo,  
476 G. Benanti, M. Giebels, M. Helmy, J. Sheehy, S. Jones, R. Juszczak, R. Klefoth, R. Lobo-do-Vale,  
477 A. P. Rosa, P. Schreiber, D. Serça, S. Vicca, B. Wolf, and J. Pumpanen. (2013). Comparison of  
478 static chambers to measure CH<sub>4</sub> emissions from soils. *Agric. For. Meteorol.*, 171, 124-136.  
479 <https://doi.org/10.1016/j.agrformet.2012.11.008>
- 480 Pumpanen, J., Ilvesniemi, H., Perämäki, M., & Hari, P. (2003). Seasonal patterns of soil  
481 CO<sub>2</sub> efflux and soil air CO<sub>2</sub> concentration in a Scots pine forest: comparison of two chamber  
482 techniques. *Glob. Change Biol.*, 9(3), 371-382. <https://doi.org/10.1046/j.1365-2486.2003.00588.x>
- 483 R Core Team (2022). R: A language and environment for statistical computing. R  
484 Foundation for Statistical Computing, Vienna, Austria. Version 4.2.2. <https://www.R-project.org/>





- 485           Reeves, S., Wang, W., Salter, B., & Halpin, N. (2016). Quantifying nitrous oxide emissions  
486 from sugarcane cropping systems: Optimum sampling time and frequency. *Atmos. Environ.*, 136,  
487 123-133. <https://doi.org/10.1016/j.atmosenv.2016.04.008>
- 488           Rochette, P., & Eriksen-Hamel, N. S. (2008). Chamber Measurements of Soil Nitrous  
489 Oxide Flux: Are Absolute Values Reliable? *Soil Sci. Soc. Am. J.*, 72(2), 331.  
490 [doi:10.2136/sssaj2007.0215](https://doi.org/10.2136/sssaj2007.0215)
- 491           Savage, K., Phillips, R., & Davidson, E. (2014). High temporal frequency measurements  
492 of greenhouse gas emissions from soils. *Biogeosciences*, 11(10), 2709-2720.  
493 <https://doi.org/10.5194/bg-11-2709-2014>
- 494           Smith, K. A., & Dobbie, K. E. (2001). The impact of sampling frequency and sampling  
495 times on chamber- based measurements of N<sub>2</sub> O emissions from fertilized soils. *Glob. Change*  
496 *Biol.*, 7(8), 933–945. <https://doi.org/10.1046/j.1354-1013.2001.00450.x>
- 497           Yu, L., Wang, H., Wang, G., Song, W., Huang, Y., Li, S. G., Liang, N., Tang, Y. & He, J.  
498 S. (2013). A comparison of methane emission measurements using eddy covariance and manual  
499 and automated chamber-based techniques in Tibetan Plateau alpine wetland. *Environ. Pollut.*, 181,  
500 81-90. <https://doi.org/10.1016/j.envpol.2013.06.018>
- 501           Wang, Z.-P., & Han, X.-G. (2005). Diurnal variation in methane emissions in relation to  
502 plants and environmental variables in the Inner Mongolia marshes. *Atmos. Environ.*, 39(34),  
503 6295–6305. <https://doi.org/10.1016/j.atmosenv.2005.07.01>
- 504           Wiebe, K., Robinson, S., & Cattaneo, A. (2019). Climate change, agriculture and food  
505 security: impacts and the potential for adaptation and mitigation. *Sustainable Food and*  
506 *Agriculture*, 55-74. <https://doi.org/10.1016/B978-0-12-812134-4.00004-2>



507           Wu, Y. F., Whitaker, J., Toet, S., Bradley, A., Davies, C. A., & McNamara, N. P. (2021).

508   Diurnal variability in soil nitrous oxide emissions is a widespread phenomenon. *Glob. Change*

509   *Biol.*, 27(20), 4950-4966. <https://doi.org/10.1111/gcb.15791>

510

511
