# Supplementary figures and images for: Measurement of greenhouse gas fluxes in agricultural soils with a flexible, open-design automated system
Source: Copernicus journal article supplement (doi:10.5194/egusphere-2024-804), 2024-04-11

511 Supplementary Materials

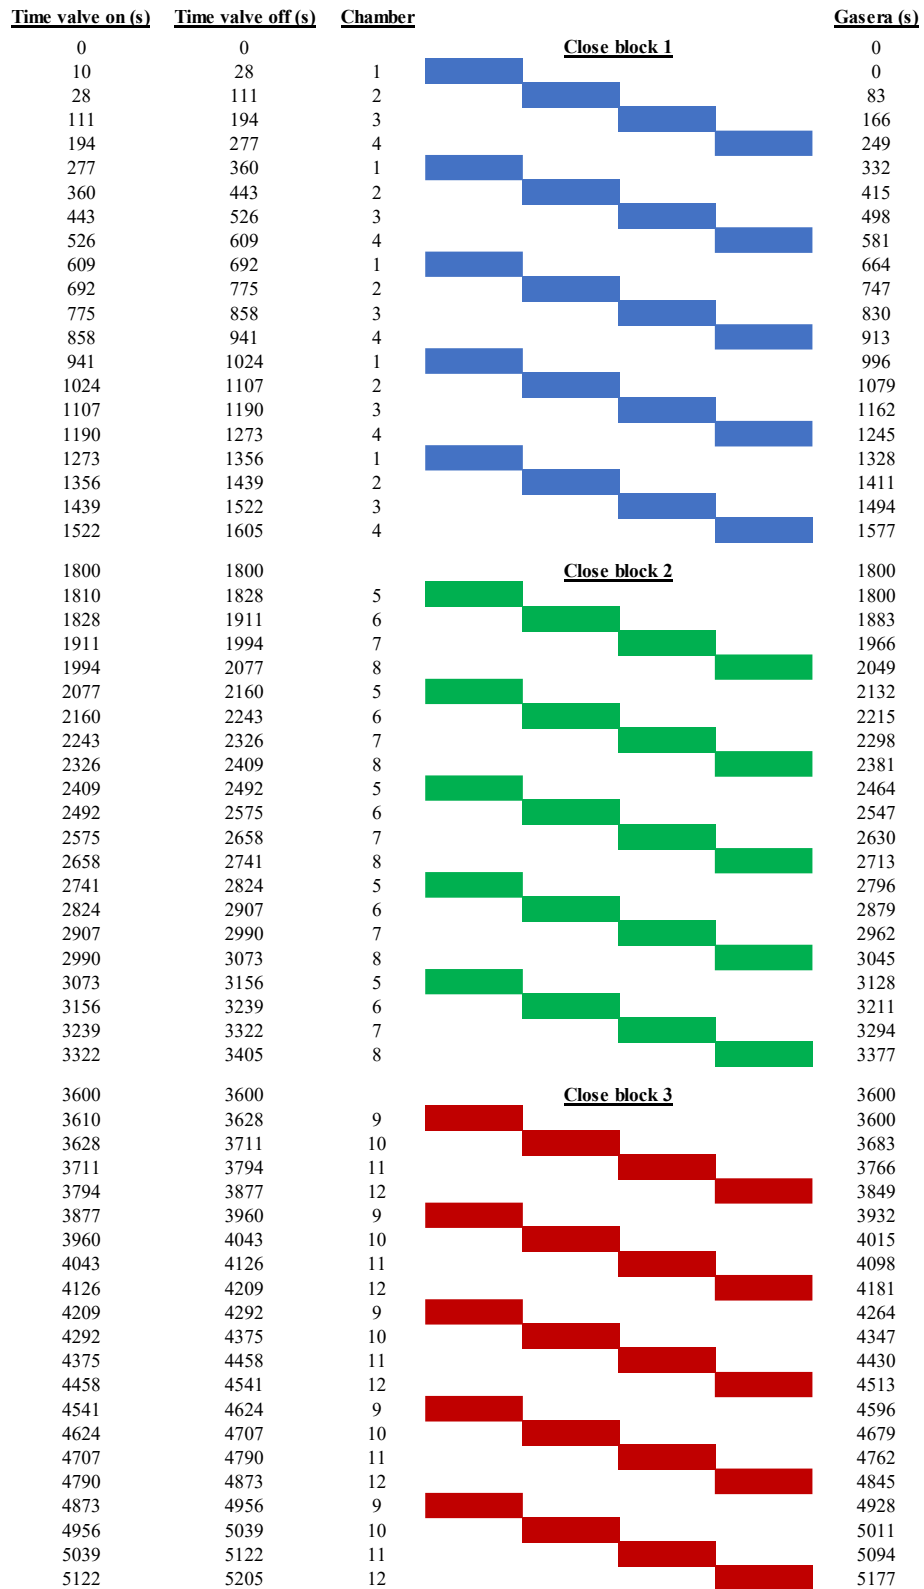

512

513 Figure S1. Scheme of the sampling sequence

Supplement: Supplementary file 1 [file egusphere-2024-804-supplement.pdf]
